# Supplementary material for: Associations between the Gut Microbiota, Race, and Ethnicity of Patients with Colorectal Cancer: A Pilot and Feasibility Study
Source: MDPI journal article supplement (doi:10.3390/cancers15184546), 2023-09-13
Supplement: s1 [file s1]

**Supplementary Table S1: Recruitment and Enrollment Procedures**

| <b>Step<sup>a</sup></b>                                        | <b>Definition</b>                                                                                                                  | <b>Information Collected</b>                                                                                     |
|----------------------------------------------------------------|------------------------------------------------------------------------------------------------------------------------------------|------------------------------------------------------------------------------------------------------------------|
| Obtain list of potentially eligible patients                   | Direct referral or by reviewing schedules of visits                                                                                | Name, medical record number, diagnosis, race/ethnicity                                                           |
| Review list of patients for preliminary eligibility            | Review electronic health record to screen for potential eligibility                                                                | Reasons for ineligibility: no active disease, on antibiotics, current therapy, language, race/ethnicity          |
| Eligible based on medical record review; attempt phone contact | Called by telephone, 3 attempts per number, kept log of phone numbers, number of contacts                                          | Wrong number<br>Called 3 times, no answer<br>Phone answered, VM only<br>Phone answered, individual not available |
| Contact, explain study                                         | Telephone recruitment script outlined type of study, reason they were contacted, brief study procedures and duration, compensation | Reasons for not being interested                                                                                 |
| Interested, screen to confirm eligibility                      | Screened for details of prior or current antibiotic use not in chart, details of current therapy (if any)                          | Reasons for ineligibility                                                                                        |
| Eligible, invite to join study                                 | If interested, participant invited to schedule time for consent in person or via telephone                                         | Reasons for declining study                                                                                      |
| Consent                                                        | Conducted via telephone or in clinic                                                                                               | n/a                                                                                                              |

<sup>a</sup>Several of these steps are described in supplemental figure 1.
