# Supplementary material for: Associations between the Gut Microbiota, Race, and Ethnicity of Patients with Colorectal Cancer: A Pilot and Feasibility Study
Source: MDPI journal article supplement (doi:10.3390/cancers15184546), 2023-09-13
Supplement: s1 [file s1]

**Supplementary Table S5: Microbial diversity is associated with race/ethnicity but not other covariates (Shannon diversity index, ANOVA test).**

| Category  | Covariate                                      | <i>p</i> -value | FDR  |  |
|-----------|------------------------------------------------|-----------------|------|--|
| SES       | Race/Ethnicity                                 | <b>0.049</b>    | 0.56 |  |
|           | Sex                                            | 0.46            | 0.90 |  |
|           | Insurance                                      | 0.61            | 0.90 |  |
|           | Education                                      | 0.38            | 0.90 |  |
| Diet      | WholeGrain (% of grains that are whole grains) | 0.81            | 0.90 |  |
|           | Meat                                           | 0.80            | 0.90 |  |
|           | FruitVeg (servings of fruits and vegetables)   | 0.68            | 0.90 |  |
|           | BMI                                            | 0.84            | 0.90 |  |
|           | Alcohol                                        | 0.21            | 0.73 |  |
|           | Fiber                                          | 0.92            | 0.92 |  |
| Treatment | Any surgery                                    | 0.77            | 0.90 |  |
|           | Any ostomy                                     | 0.08            | 0.58 |  |
|           | Ileostomy                                      | 0.17            | 0.73 |  |
|           | Radiation                                      | 0.58            | 0.90 |  |

**Supplementary Table S6: Microbial composition is associated with race/ethnicity and ileostomy but not other patient covariates (Bray-Curtis ordination, PERMANOVA test).**

| Category | Covariate                                      | R <sup>2</sup> | <i>p</i> -value | FDR  |
|----------|------------------------------------------------|----------------|-----------------|------|
| SES      | Race/Ethnicity                                 | <b>0.15</b>    | <b>0.036</b>    | 0.28 |
|          | Sex                                            | 0.06           | 0.21            | 0.58 |
|          | Insurance                                      | 0.20           | 0.18            | 0.58 |
|          | Education                                      | 0.060          | 0.29            | 0.58 |
| Diet     | WholeGrain (% of grains that are whole grains) | 0.15           | 0.94            | 0.94 |

|           |                                              |              |              |      |
|-----------|----------------------------------------------|--------------|--------------|------|
|           | Meat                                         | 0.15         | 0.90         | 0.94 |
|           | FruitVeg (servings of fruits and vegetables) | 0.16         | 0.79         | 0.92 |
|           | BMI                                          | 0.11         | 0.55         | 0.86 |
|           | Alcohol                                      | 0.054        | 0.64         | 0.90 |
|           | Fiber                                        | 0.062        | 0.34         | 0.60 |
| Treatment | Any surgery                                  | 0.051        | 0.77         | 0.92 |
|           | Any ostomy                                   | 0.065        | 0.26         | 0.58 |
|           | Ileostomy                                    | <b>0.091</b> | <b>0.040</b> | 0.28 |
|           | Radiation                                    | 0.069        | 0.16         | 0.58 |
