# Supplementary material for: Associations between the Gut Microbiota, Race, and Ethnicity of Patients with Colorectal Cancer: A Pilot and Feasibility Study
Source: Cancers (Basel). 2023 Sep 13;15(18):4546. doi: 10.3390/cancers15184546 (PMC10526839; doi:10.3390/cancers15184546)
Supplement: Supplementary file 1 [file cancers-15-04546-s001.zip]

Archive with 4 entries (4 files):
- Supplementary Figure S1.pdf
- Supplementary Table S1.pdf
- Supplementary Tables S5 and S6.pdf
- SupplementaryTables S2, S3, S4.xlsx
