# Supplementary material for: Associations between the Gut Microbiota, Race, and Ethnicity of Patients with Colorectal Cancer: A Pilot and Feasibility Study
Source: Cancers (Basel). 2023 Sep 13;15(18):4546. doi: 10.3390/cancers15184546 (PMC10526839; doi:10.3390/cancers15184546)
Supplement: Supplementary file 1 [file cancers-15-04546-s001.zip › SupplementaryTables S2, S3, S4.xlsx]

## Sheet: Table S2
	Supplementary Table 2. 16S rRNA gene sequencing depth and alpha diversity.
	Sample	Sex	Race/Ethnicity	Sequencing Reads	Total ASVs	Sub-sampled ASVs	Shannon diversity index (sub-sampled)
	MicroDisp-Pt444	Male	Black/African American	48536	57	52	2.52611
	MicroDisp-Pt455	Male	Black/African American	20842	126	124	4.10789
	MicroDisp-Pt478	Male	Black/African American	38052	197	187	4.07102
	MicroDisp-Pt485	Female	Black/African American	36111	211	198	4.17847
	MicroDisp-Pt424	Male	Hispanic/Latino	10790	102	102	3.75694
	MicroDisp-Pt432	Female	Hispanic/Latino	42640	44	44	2.40363
	MicroDisp-Pt445	Male	Hispanic/Latino	71597	135	126	3.46013
	MicroDisp-Pt457	Female	Hispanic/Latino	27662	87	83	3.54384
	MicroDisp-Pt458	Female	Hispanic/Latino	21747	133	132	4.0484
	MicroDisp-Pt462	Female	Hispanic/Latino	46695	115	107	3.50898
	MicroDisp-Pt483	Female	Hispanic/Latino	58482	144	135	3.50127
	MicroDisp-Pt164	Female	Non-Hispanic White	33350	206	203	4.51995
	MicroDisp-Pt473	Male	Non-Hispanic White	43367	214	199	4.44647
	MicroDisp-Pt482	Male	Non-Hispanic White	61288	212	205	4.2514
	MicroDisp-Pt488	Male	Non-Hispanic White	20392	169	162	4.22806
	MicroDisp-Pt489	Male	Non-Hispanic White	65822	250	227	4.39441
	MicroDisp-Pt492	Female	Non-Hispanic White	57997	134	122	3.63957
	MicroDisp-Pt495	Female	Non-Hispanic White	55944	165	158	3.9794

## Sheet: Table S3
	Supplementary Table 3. Centered log-ratio transformed abundances of phyla.
	Sample	Sex	Race/Ethnicity	Euryarchaeota abundance	Actinobacteriota abundance	Bacteroidota abundance	Cyanobacteria abundance	Desulfobacterota abundance	Firmicutes abundance	Fusobacteriota abundance	Proteobacteria abundance	Synergistota abundance	Verrucomicrobiota abundance
	MicroDisp-Pt444	Male	Black/African American	-5.81921	6.03943	3.96712	-5.81921	-5.81921	10.4693	-0.497343	9.11751	-5.81921	-5.81921
	MicroDisp-Pt455	Male	Black/African American	-6.63957	4.22259	7.18484	-6.63957	2.16171	8.25165	1.00416	3.73334	-6.63957	-6.63957
	MicroDisp-Pt478	Male	Black/African American	-2.53669	2.2247	5.69272	-1.17999	-0.714329	5.83772	-5.08688	1.90018	-5.89424	-0.243187
	MicroDisp-Pt485	Female	Black/African American	3.51833	4.91524	4.3703	-8.64616	1.42238	7.10506	-8.64616	1.70662	0.279079	-6.0247
	MicroDisp-Pt424	Male	Hispanic/Latino	-0.013524	1.73272	6.54798	-2.38276	-0.645792	7.31276	-6.58909	1.4246	-6.58909	-0.797795
	MicroDisp-Pt432	Female	Hispanic/Latino	-6.10305	8.33856	3.25985	-1.3117	-6.10305	10.0733	-1.48162	5.53379	-6.10305	-6.10305
	MicroDisp-Pt445	Male	Hispanic/Latino	-0.554312	7.03843	8.77099	-6.8762	-1.4474	9.69211	-6.8762	4.00499	-6.8762	-6.8762
	MicroDisp-Pt457	Female	Hispanic/Latino	-5.25773	6.64672	8.72338	-5.25773	-5.25773	10.1367	-5.25773	6.03959	-5.25773	-5.25773
	MicroDisp-Pt458	Female	Hispanic/Latino	-0.0155961	5.52074	8.1625	-6.0964	-6.0964	8.60462	-2.1531	4.26644	-6.0964	-6.0964
	MicroDisp-Pt462	Female	Hispanic/Latino	-5.57737	8.75635	8.59359	-5.57737	-5.57737	10.4629	-5.57737	5.65137	-5.57737	-5.57737
	MicroDisp-Pt483	Female	Hispanic/Latino	-6.95012	7.56464	-0.0807309	-2.7437	-0.805096	9.7284	-6.95012	6.49312	-6.95012	0.693709
	MicroDisp-Pt164	Female	Non-Hispanic White	-1.09063	1.81412	5.67873	0.868728	-3.58248	7.60425	-8.20393	3.85215	-8.20393	1.26301
	MicroDisp-Pt473	Male	Non-Hispanic White	-0.0533909	3.41716	6.82273	-2.60798	-1.70109	7.72553	-8.22944	3.37644	-8.22944	-0.520517
	MicroDisp-Pt482	Male	Non-Hispanic White	2.37589	2.67029	7.59355	-8.07529	0.038019	8.2639	-8.07529	3.16822	0.116022	-8.07529
	MicroDisp-Pt488	Male	Non-Hispanic White	0.621581	3.10255	5.14017	-0.287907	-2.49736	6.93987	-8.11882	0.702312	-5.49736	-0.105043
	MicroDisp-Pt489	Male	Non-Hispanic White	-0.20494	5.33383	6.81757	-8.14833	1.96498	8.5038	-8.14833	3.60241	-8.14833	-1.57267
	MicroDisp-Pt492	Female	Non-Hispanic White	-6.99004	5.38796	8.06629	-6.99004	1.84086	9.46563	-6.99004	5.24611	-6.99004	-2.04667
	MicroDisp-Pt495	Female	Non-Hispanic White	-7.54934	4.80258	7.86459	2.95475	-0.0699139	8.41938	-7.54934	6.22597	-7.54934	-7.54934

## Sheet: Table S4
	Supplementary Table 4. Differentially abundant amplicon sequence variants (ASVs) from the pairwise comparisons of different races/ethnicities.
	ASV Identifiers	Phylum	Genus	Species	Log2 fold-change (AA/L)	Nominal p-value (AA/L)	-log10 adjusted p-value (AA/L)	Significant changes (AA/L)	Log2 FC (AA/W)	Nominal p-value (AA/W)	-log10 adjusted p-value (AA/W)	Significant changes (AA/W)	Log2 FC (L/W)	Nominal p-value (L/W)	-log10 adjusted p-value (L/W)	Significant changes (L/W)
	a08e028e952d23166b1e7380f41ccca1	Firmicutes	Romboutsia	NA	-20.9326	1.3592e-07	5.48578	Decreased	0	1	0		24.7338	1.93243e-13	11.3717	Increased
	9282e20164736c7ada9bd98d04654b5e	Proteobacteria	Sutterella	gut_metagenome	-22.6539	1.15469e-08	6.2726	Decreased	0	1	0		38.6539	1.34883e-30	27.5356	Increased
	ac11726e4c3f29d2e1beb38dc31eb68e	Actinobacteriota	Eggerthella	uncultured_bacterium	-20.4826	2.48683e-07	5.25684	Decreased	0	1	0		32.8353	1.58354e-22	19.943	Increased
	7af6fc12809fdafab918881f836460f8	Firmicutes	Tyzzerella	NA	-22.7175	1.05122e-08	6.27861	Decreased	0	1	0		35.0581	1.84126e-25	22.7015	Increased
	432c814024bdfd89d3273986167eefb9	Firmicutes	[Ruminococcus]_gauvreauii_group	uncultured_organism	-21.5945	5.37293e-08	5.82314	Decreased	0	1	0		29.4998	1.74033e-18	15.969	Increased
	8ce212aaf7d867e84eab351d75eeecfa	Firmicutes	Lachnoclostridium	NA	-21.6451	5.01379e-08	5.82314	Decreased	0	1	0		26.1457	7.56549e-15	12.6318	Increased
	e865f29a716e8d51f83931befa951240	Firmicutes	Erysipelotrichaceae_UCG-003	NA	-9.89746	0.000152327	2.52971	Decreased	-9.9228	0.000146463	2.70847	Decreased	-0.0253449	0.990148	0
	9ea77e95fbfd1a99c9c28db3b03a01a8	Bacteroidota	Barnesiella	NA	-19.6748	7.30647e-07	4.80458	Decreased	-22.1942	2.26571e-08	6.20039	Decreased	-2.51935	0.441795	0.0903637
	1b9ab7ba8573cbfe5f1a9f59f0b38ff4	Actinobacteriota	Adlercreutzia	NA	-8.91819	0.000369916	2.15817	Decreased	-8.11104	0.00120476	1.81033	Decreased	0.807156	0.679355	0.00200633
	671f56cb9e843dbbacd5e8646ae48b4a	Actinobacteriota	uncultured	uncultured_bacterium	-20.0128	2.28992e-08	6.09765	Decreased	-19.1853	8.55047e-08	5.79954	Decreased	0.827518	0.777845	0
	1569f7ae988e26c905ab8fab427c8a0d	Firmicutes	Phascolarctobacterium	NA	-22.3777	1.7336e-08	6.1283	Decreased	-23.5966	2.78078e-09	6.70198	Decreased	-1.21888	0.709538	0
	f0015c3b64e80303ed3d858f0618bc43	Firmicutes	Monoglobus	NA	-20.5211	2.3737e-07	5.26067	Decreased	-15.8796	7.40523e-05	2.98693	Decreased	4.64152	0.161971	0.176268
	410e1eaa1468a3d40595898f671ba0b3	Firmicutes	[Eubacterium]_coprostanoligenes_group	NA	-21.4231	6.82601e-08	5.74869	Decreased	-21.4505	6.56482e-08	5.88948	Decreased	-0.0274249	0.993316	0
	86ff0efd7fd88b82809500c90c4a7832	Firmicutes	Faecalibacterium	metagenome	-21.3587	1.58788e-12	9.02031	Decreased	-23.9047	2.54915e-15	12.0699	Decreased	-2.54605	0.294139	0.131669
	b726627e18f29e0da5289f81ca294f92	Firmicutes	Subdoligranulum	uncultured_organism	-18.569	3.00124e-06	4.20622	Decreased	-20.5246	2.3593e-07	5.44589	Decreased	-1.95564	0.551103	0.0481648
	601101d33cdf43a40bd674a50711af52	Firmicutes	Roseburia	NA	-9.2931	0.00512584	1.02987	Decreased	-10.4458	0.00165261	1.68945	Decreased	-1.15269	0.668847	0.00200633
	df16a09f3e448ddd3b1ec54066d3081d	Firmicutes	Butyricicoccus	NA	-9.51916	0.00547927	1.024	Decreased	-7.60449	0.0265451	0.570784		1.91468	0.492891	0.0715501
	5c68ef2fd4b94cf4e302d4c8e2ef1fe1	Firmicutes	Mogibacterium	uncultured_bacterium	24.9341	1.8739e-10	7.64735	Increased	5.03921	0.19005	0.108807		-19.8949	3.60709e-09	7.38714	Decreased
	9908fffab7ed4f3bec44cda2f5084d49	Firmicutes	Enterococcus	NA	18.1598	4.51466e-06	4.04362	Increased	-5.47996	0.158331	0.108807		-23.6397	2.04781e-12	10.4512	Decreased
	bea2245c01baedd6d4a6d6e4e857f9f6	Bacteroidota	Butyricimonas	NA	22.701	6.7027e-09	6.43627	Increased	1.03203	0.788182	0.00576095		-21.669	1.19103e-10	8.82007	Decreased
	1ab75f81f06d896defe1a2a976e99bcd	Bacteroidota	Bacteroides	Bacteroides_eggerthii	23.6703	1.47151e-09	6.89846	Increased	0.353915	0.926533	0		-23.3164	4.07296e-12	10.2317	Decreased
	173c825a18291f2ba18b5e46d9db8408	Bacteroidota	Parabacteroides	Parabacteroides_distasonis	21.3746	4.90372e-08	5.82314	Increased	-2.3441	0.54184	0.0348721		-23.7187	1.73041e-12	10.5066	Decreased
	8343cf4c26bb977e05e4d9c5125441ef	Bacteroidota	Parabacteroides	Parabacteroides_distasonis	23.5703	1.72479e-09	6.88748	Increased	0.936099	0.807345	0.00376353		-22.6342	1.68959e-11	9.65525	Decreased
	9d583502f595e3a521989b645d50e327	Bacteroidota	Alistipes	Bacteroides_sp.	21.9487	2.09759e-08	6.09765	Increased	-1.04243	0.786102	0.00576095		-22.9911	8.07825e-12	9.96235	Decreased
	21401b105dc53b367b8fdc0ec97a9f02	Proteobacteria	Sutterella	NA	22.958	9.28917e-10	7.0313	Increased	-1.14067	0.756007	0.00576095		-24.0987	7.58982e-14	11.6884	Decreased
	35195a80f6fb69ef8bd6827d1b045aad	Actinobacteriota	Senegalimassilia	uncultured_bacterium	24.4028	4.17649e-11	8.07654	Increased	1.62605	0.653182	0.0134016		-22.7768	8.03094e-13	10.8022	Decreased
	9485b02b23151434f16cad24e0fe240f	Actinobacteriota	Collinsella	Collinsella_sp.	23.3826	2.31943e-09	6.80999	Increased	2.093	0.585797	0.0244769		-21.2896	2.50558e-10	8.50968	Decreased
	c97ea25ba069877eac769cb05968724c	Firmicutes	Clostridia_UCG-014	NA	21.9056	2.22263e-08	6.09765	Increased	-1.50448	0.695221	0.00839115		-23.4101	3.33469e-12	10.2903	Decreased
	6db169339ee5897780e713c44784d74a	Firmicutes	Clostridia_UCG-014	gut_metagenome	21.2975	5.5006e-08	5.82314	Increased	-2.22615	0.562432	0.031561		-23.5236	2.62816e-12	10.3762	Decreased
	16530e5b50b780018210dac05a471715	Firmicutes	UCG-002	NA	22.8831	5.06379e-09	6.51665	Increased	-1.42846	0.709803	0.00713296		-24.3115	4.7747e-13	11.0078	Decreased
	84f9cf6d08ccc7adb4e945c4fd8be494	Firmicutes	UCG-002	NA	20.8218	1.09787e-07	5.56078	Increased	-3.09166	0.421416	0.0761259		-23.9134	1.13793e-12	10.6701	Decreased
	1b92901eaf73176b86069084ac8c13e3	Firmicutes	Lachnospiraceae_UCG-010	uncultured_organism	21.8572	2.39195e-08	6.09765	Increased	1.10568	0.773639	0.00576095		-20.7515	7.09312e-10	8.06998	Decreased
	b4d07c2a22af0c99c73cf9722200d878	Firmicutes	Lachnospiraceae_NK4A136_group	NA	23.3219	4.18511e-11	8.07654	Increased	-2.08089	0.546416	0.0348721		-25.4028	6.5615e-17	14.5018	Decreased
	25394a604bbcd078c80186b300dab8ee	Firmicutes	Holdemanella	uncultured_bacterium	10.8615	0.00551054	1.024	Increased	10.8478	0.00557004	1.17755	Increased	0	1	0
	2c982937754e6321f861027032db80f7	Bacteroidota	Bacteroides	NA	24.9817	1.73062e-10	7.64735	Increased	24.8683	2.09065e-10	7.457	Increased	0	1	0
	84d5a713b1d46f0e0e0f7ba784e9925d	Bacteroidota	Prevotellaceae_NK3B31_group	uncultured_organism	0	1	0		-22.7412	1.0132e-08	6.37365	Decreased	-39.1558	2.35009e-31	27.9934	Decreased
	b7e5e417da183df1d5cb33a51a10991d	Bacteroidota	Bacteroides	Bacteroides_salyersiae	0	1	0		-22.5217	1.40482e-08	6.28287	Decreased	-26.8221	1.48513e-15	13.2719	Decreased
	dbcdaca3ee9e9fe75d8829e87b8551dc	Proteobacteria	Sutterella	NA	0	1	0		-10.4419	0.00853016	1.00769	Decreased	-10.3283	0.00212295	1.63964	Decreased
	69659d7edd60cd37bbdc9e3bb7f77431	Actinobacteriota	Collinsella	Collinsella_stercoris	0	1	0		-22.141	2.45363e-08	6.20039	Decreased	-26.0668	8.98905e-15	12.5869	Decreased
	e603a72ebbc7a4fcb5a657b52c3e8c50	Proteobacteria	uncultured	Azospirillum_sp.	0	1	0		-20.9238	1.37449e-07	5.61686	Decreased	-24.8761	1.40311e-13	11.4727	Decreased
	a2217cc8df6a4c209aee7f31a304c2b0	Firmicutes	NK4A214_group	NA	0	1	0		-21.9761	3.11504e-08	6.15888	Decreased	-26.8301	1.46934e-15	13.2719	Decreased
	aae4c4ed528ae16ec417df816699cfdb	Firmicutes	UCG-005	NA	0	1	0		-21.886	3.54425e-08	6.13085	Decreased	-28.1605	5.51185e-17	14.5263	Decreased
	1af612d90153f4aa10245d1e813d3dc3	Firmicutes	[Eubacterium]_coprostanoligenes_group	NA	0	1	0		-23.2013	5.08803e-09	6.54785	Decreased	-36.0542	7.77172e-27	23.9511	Decreased
	45c80843dac191f771b11018ff90d94c	Firmicutes	Ruminococcus	NA	0	1	0		-22.4302	1.60811e-08	6.27838	Decreased	-26.3188	4.94954e-15	12.7839	Decreased
	72ec78ecd4c30c1ddc64900630f35387	Firmicutes	Lachnospira	NA	0	1	0		-22.8609	8.49003e-09	6.39244	Decreased	-34.15	3.04282e-24	21.5802	Decreased
	07fd92a29ce27a31f4d95c6821595530	Firmicutes	Lachnospiraceae_UCG-001	Lachnospiraceae_bacterium	0	1	0		-20.7678	1.70309e-07	5.56724	Decreased	-24.7261	1.96729e-13	11.3717	Decreased
	8ee6f70260b29cb40fdff8d4500ae32a	Firmicutes	Lachnospiraceae_UCG-001	NA	0	1	0		-20.8287	1.56665e-07	5.58231	Decreased	-25.1088	8.33191e-14	11.6742	Decreased
	4ada3d8098e9706fcebb85f1e427fea6	Firmicutes	NA	NA	0	1	0		-22.0141	2.95081e-08	6.15888	Decreased	-27.293	4.77851e-16	13.6852	Decreased
	d900eb33f6b4bc449aab64df16ae18b2	Bacteroidota	Bacteroides	Bacteroides_stercoris	3.96921	0.228237	0		-3.28428	0.317177	0.0920477		-7.25349	0.00989506	1.01255	Decreased
	2489471b3729e885a2c1ddaa10774d8e	Firmicutes	Negativibacillus	NA	4.35221	0.184969	0		-2.86678	0.369286	0.0895859		-7.21899	0.0103041	1.00472	Decreased
	ab4040fe8717efa3f115680ae82cd72a	Firmicutes	Roseburia	NA	6.7676	0.0273791	0.39649		-1.65076	0.578345	0.0258206		-8.41836	0.00145623	1.79235	Decreased
	662a40a2523f7669fa865700fc74a1cf	Firmicutes	uncultured	uncultured_organism	0	1	0		-7.66994	0.0232955	0.614131		-7.55626	0.00814041	1.07712	Decreased
	2c5e87b291147c04e1b8d1c808b1aee0	Actinobacteriota	Bifidobacterium	NA	-0.225123	0.95323	0		23.3152	2.5792e-09	6.70198	Increased	23.5403	2.53347e-12	10.3762	Increased
	cf0e29b1acfd7c9cc92b326cbfc88908	Firmicutes	Eubacterium	NA	-4.39594	0.257017	0		18.6551	2.36672e-06	4.46384	Increased	23.0511	7.15062e-12	10.0015	Increased
	3fa3bc57e77ce8e3c12a8d89543c8179	Firmicutes	[Eubacterium]_coprostanoligenes_group	gut_metagenome	-0.17187	0.964287	0		23.2245	2.97332e-09	6.70198	Increased	23.3963	3.44057e-12	10.2903	Increased
	da8644094f1d480f3b3a6a03a7027ab4	Firmicutes	Hungatella	NA	1.95202	0.611944	0		22.0739	1.73488e-08	6.27838	Increased	20.1219	2.38163e-09	7.55584	Increased
	58bd181f757283f5a4ceebdf90ff6243	Firmicutes	Sellimonas	uncultured_bacterium	-9.31051	0.0190167	0.533056		0	1	0		9.1832	0.00630235	1.1778	Increased
	d49783e7800974b5f2bcce554e26072e	Firmicutes	Blautia	NA	-8.49564	0.0247958	0.428807		0	1	0		8.36832	0.00898258	1.04458	Increased
	44396f15b10f6577d61a11c6047c939f	Euryarchaeota	Methanobrevibacter	NA	4.27956	0.170663	0		1.26394	0.685439	0.0113524		-3.01562	0.25786	0.131669
	d20b46e3c9d79a8e49a48f112fc03d4f	Firmicutes	Romboutsia	NA	2.2165	0.563738	0		1.47958	0.69989	0.00839115		-0.736915	0.822023	0
	e335f74033bc634af43ee6baa84fa247	Firmicutes	Romboutsia	NA	-0.538613	0.801983	0		-0.110072	0.959127	0		0.42854	0.815008	0
	99bccd58aaeb00f98e22add40be6e36b	Firmicutes	Clostridioides	Clostridioides_difficile	2.48563	0.531591	0		NA	NA	NA		NA	NA	NA
	6420671c26eef32065e0275c8cd6701e	Firmicutes	Intestinibacter	NA	-3.5892	0.166097	0		-2.89122	0.26463	0.0967748		0.697976	0.751944	0
	8d703908c09c7cb0da2a4398dd74f9f8	Firmicutes	Terrisporobacter	uncultured_bacterium	-0.352595	0.926899	0		-2.98507	0.437081	0.0730923		-2.63248	0.421489	0.0995656
	1f0532e025d966a685fd0d1f3144bc8a	Firmicutes	Peptostreptococcus	uncultured_organism	4.02775	0.305902	0		NA	NA	NA		0	1	0
	300568e1ddcb6356519af1a75ab2df4b	Firmicutes	Mogibacterium	Mogibacterium_diversum	1.37706	0.72722	0		NA	NA	NA		NA	NA	NA
	0087d7b7b3b11429bfe8890273615ddb	Firmicutes	[Eubacterium]_nodatum_group	Eubacterium_sp.	3.30867	0.401909	0		NA	NA	NA		NA	NA	NA
	082141bf0c475620ca2f0b84ef4c260c	Firmicutes	[Eubacterium]_nodatum_group	NA	0	1	0		NA	NA	NA		-3.28335	0.33231	0.131669
	b4f28264f150902936030ef29ce2a10a	Firmicutes	[Eubacterium]_brachy_group	uncultured_bacterium	-0.314884	0.926706	0		-0.960227	0.778638	0.00576095		-0.645343	0.824462	0
	6e9ac49ab03e8cf905432ad62df55c30	Firmicutes	Family_XIII_UCG-001	uncultured_bacterium	0	1	0		NA	NA	NA		-3.57989	0.289829	0.131669
	2102f51f3591341a5e15fb5958ee321c	Firmicutes	Family_XIII_UCG-001	uncultured_bacterium	4.35422	0.267848	0		NA	NA	NA		-0.0136726	0.996837	0
	74d519816d4cfb9cf4ec9605f76301d6	Firmicutes	Family_XIII_UCG-001	uncultured_bacterium	-2.83341	0.479106	0		-4.3795	0.271235	0.0967748		-1.54608	0.642014	0.00822296
	b0d377a86f6a052e8507078a71feb7e2	Firmicutes	Family_XIII_UCG-001	uncultured_bacterium	0	1	0		NA	NA	NA		NA	NA	NA
	6c4dcaea3271e5e69ab4ae82e8284911	Firmicutes	Family_XIII_AD3011_group	uncultured_bacterium	0	1	0		NA	NA	NA		-3.55181	0.293686	0.131669
	0be2b2840d439b1b8548e8010f8310e5	Firmicutes	Family_XIII_AD3011_group	uncultured_bacterium	4.08806	0.298611	0		NA	NA	NA		0	1	0
	4a1c5fb315646700069f4c358a196b9f	Firmicutes	Family_XIII_AD3011_group	uncultured_Eubacterium	0	1	0		-4.47137	0.261227	0.0967748		-4.35769	0.19644	0.131669
	9b12ea14bff8a37dc1d39b36b5b904d6	Firmicutes	Family_XIII_AD3011_group	uncultured_bacterium	0.0935871	0.980851	0		-1.49908	0.699315	0.00839115		-1.59267	0.630598	0.00822296
	15bb15f4b8a1556406fbc28ef5eb6030	Firmicutes	Family_XIII_AD3011_group	uncultured_bacterium	0	1	0		NA	NA	NA		NA	NA	NA
	39f94c50ed5ba9ec7085c9c0e312c16a	Firmicutes	Family_XIII_AD3011_group	uncultured_bacterium	0	1	0		NA	NA	NA		-3.5026	0.300531	0.131669
	c3337d877a02fb500fc37be8aa4fd234	Firmicutes	Family_XIII_AD3011_group	uncultured_organism	0.526695	0.891476	0		-0.215237	0.955476	0		-0.741932	0.821757	0
	e152b3976d815ac8f84c82daf06d1c10	Firmicutes	Family_XIII_AD3011_group	NA	2.46399	0.529308	0		NA	NA	NA		1.61042	0.638732	0.00822296
	889f033ba9c5bb9a721a2c7c84816ca6	Firmicutes	[Eubacterium]_brachy_group	uncultured_Eubacteriaceae	0	1	0		NA	NA	NA		NA	NA	NA
	9b6acfb0708fe91f75081d6801659932	Firmicutes	Family_XIII_AD3011_group	uncultured_organism	-2.30015	0.566668	0		-3.75321	0.346455	0.0912884		-1.45305	0.664098	0.0020938
	644fd07dc284e48b3f9bdbf76078fd2e	Firmicutes	S5-A14a	uncultured_Anaerovorax	-2.4129	0.547547	0		NA	NA	NA		NA	NA	NA
	3aad083a4c822d27071d1ff6163cbfb2	Firmicutes	Izemoplasmatales	uncultured_organism	0	1	0		NA	NA	NA		-3.40647	0.314205	0.131669
	995369b56cd341ab75bfc0281518d9ab	Firmicutes	Izemoplasmatales	gut_metagenome	-3.51655	0.378232	0		NA	NA	NA		3.38919	0.316907	0.131669
	7fd072aff74564746d11ca0c54ee6ae2	Firmicutes	Izemoplasmatales	gut_metagenome	1.56806	0.696773	0		NA	NA	NA		NA	NA	NA
	26c6e3ed14694582e207478c1f23c21f	Firmicutes	Turicibacter	NA	-3.65768	0.201275	0		-2.18677	0.444909	0.0730923		1.47091	0.546342	0.0486557
	85c44c83eddc5d3028261a1000b7d0e1	Firmicutes	Gemella	NA	4.71283	0.225511	0		4.32973	0.264281	0.0967748		-0.383096	0.909602	0
	48782307120574c67aaa25ec7ce686ba	Firmicutes	Bacillus	NA	-2.70845	0.498971	0		NA	NA	NA		NA	NA	NA
	2bd9309f2f97cae51d18d06ea1ca519a	Firmicutes	Granulicatella	NA	7.76649	0.04726	0.227873		5.11741	0.18633	0.108807		-2.64907	0.435985	0.0942607
	a443e786f67086749ef29ce0ab494c9e	Firmicutes	Enterococcus	NA	-5.25234	0.186503	0		0	1	0		5.12499	0.128196	0.220429
	33295f1846cff2bf9c88e15798fbc91d	Firmicutes	Anoxybacillus	NA	0	1	0		NA	NA	NA		NA	NA	NA
	65d43491988bfe557da4d86a5ba25dae	Firmicutes	Staphylococcus	NA	2.85837	0.470378	0		NA	NA	NA		NA	NA	NA
	d114fb4c335125128be28401522dd41a	Firmicutes	Lactococcus	Lactococcus_lactis	2.55671	0.413095	0		2.27744	0.465767	0.0634516		-0.27927	0.916697	0
	fd2eb1fe2266eed160a855f715f7c77e	Firmicutes	Streptococcus	Streptococcus_anginosus	3.98461	0.300805	0		8.09392	0.0386607	0.457185		4.10931	0.223607	0.131669
	fd496fd32dc8c08ade2e8b6c9d8ee13d	Firmicutes	Streptococcus	Streptococcus_salivarius	-0.0332909	0.988569	0		-0.94248	0.684998	0.0113524		-0.909189	0.646334	0.00822296
	06f825b512d903b9230e1a55d87359ee	Firmicutes	Streptococcus	NA	3.24439	0.216937	0		2.50254	0.340051	0.0912884		-0.741856	0.741577	0
	edc9e5c16e40aff1eadce6597940f08f	Firmicutes	Streptococcus	NA	1.53568	0.521916	0		1.4438	0.547075	0.0348721		-0.0918771	0.9642	0
	e7cfd084265c4df4856ca07b1c9b24ee	Firmicutes	Streptococcus	Streptococcus_mutans	0.0970604	0.973383	0		0.978914	0.737075	0.00576095		0.881853	0.723401	0
	9845bc7757c672e9df183be141179416	Firmicutes	Streptococcus	Streptococcus_sobrinus	0	1	0		NA	NA	NA		-3.01309	0.374375	0.125663
	c667664df1fb6f8705f9a8a861370a72	Firmicutes	Lactobacillus	Lactobacillus_delbrueckii	0	1	0		NA	NA	NA		NA	NA	NA
	4921d046c2494b5875e699d4a6efc4b6	Firmicutes	Lactobacillus	NA	-2.65528	0.507539	0		NA	NA	NA		NA	NA	NA
	af447f79eafcbd7e31e18eaf72dc845d	Firmicutes	Lactobacillus	NA	3.67219	0.351283	0		NA	NA	NA		NA	NA	NA
	8df399e29acb5a583f449a82db4e17c9	Firmicutes	Lactobacillus	NA	-3.0987	0.438286	0		-4.10749	0.302398	0.0920477		-1.00879	0.761359	0
	aef3f53e6fd7034094a2aceded298c53	Firmicutes	Lactobacillus	NA	3.30867	0.401909	0		NA	NA	NA		NA	NA	NA
	29daaf94c6c9c41e5044aa321d18a306	Firmicutes	Lactobacillus	NA	4.17846	0.287906	0		0.616036	0.873646	0		-3.56242	0.292225	0.131669
	56c6d2ef4f09b1d62536a081cf36b925	Firmicutes	Lactobacillus	Lactobacillus_fermentum	-3.23854	0.417599	0		NA	NA	NA		3.11118	0.358977	0.131669
	1a069ea36017c7efc95d851374fa7382	Firmicutes	Lactobacillus	Lactobacillus_vaginalis	7.56189	0.0534113	0.192463		7.54822	0.0538441	0.347175		0	1	0
	05040536cfc19e338f18624893c4bbdd	Firmicutes	Lactobacillus	NA	3.79603	0.335011	0		NA	NA	NA		0	1	0
	2331ca1e90c178845af3b2f3d02a9fba	Firmicutes	Lactobacillus	NA	3.47608	0.378068	0		NA	NA	NA		NA	NA	NA
	bd2ad00d586fbb853586dae6812f7b24	Firmicutes	Pediococcus	NA	0	1	0		NA	NA	NA		-2.99396	0.377473	0.125555
	3420507770c6d10a3672aeb8c6125f3f	Firmicutes	Lactobacillus	Lactobacillus_sanfranciscensis	-2.60946	0.514984	0		NA	NA	NA		NA	NA	NA
	f58404da296a4a3870dfba5852a6a763	Firmicutes	Weissella	NA	0	1	0		NA	NA	NA		NA	NA	NA
	9e75d15ba3717ca20d8aa45e3c4a6bab	Firmicutes	Leuconostoc	NA	-3.91999	0.325354	0		-1.36394	0.7359	0.00576095		2.55605	0.449554	0.0864826
	6f980c6f3f2ffefd2013c721461cc1c6	Firmicutes	Holdemania	uncultured_bacterium	-0.729829	0.80633	0		-1.37146	0.644408	0.0140422		-0.641633	0.799329	0
	aa052f6ed7696840ff494c82879d3e1a	Firmicutes	Holdemania	uncultured_bacterium	-1.59502	0.692413	0		NA	NA	NA		-0.998119	0.76853	0
	8e493df449e84acb4e24f5811ff3599b	Firmicutes	Solobacterium	Solobacterium_moorei	0.891721	0.819801	0		NA	NA	NA		2.34793	0.491053	0.0715501
	782a79a0725adc6ac22fc1fd15933a12	Firmicutes	Holdemanella	NA	-0.959401	0.802535	0		5.38963	0.160571	0.108807		6.34903	0.0527005	0.413553
	5f8d35126b0a7321413d21487ec72b73	Firmicutes	[Clostridium]_innocuum_group	NA	-2.64019	0.494564	0		3.71783	0.345199	0.0912884		6.35802	0.0587997	0.380471
	04ca162b3dd2dc7f483ab3503bc605c3	Firmicutes	[Clostridium]_innocuum_group	NA	0	1	0		NA	NA	NA		NA	NA	NA
	7a3090aa682623800304aca0da51c22c	Firmicutes	Faecalitalea	uncultured_organism	-6.19612	0.118862	0		-3.05063	0.445322	0.0730923		3.14548	0.341789	0.131669
	f7870a4e6cccb8a029cf6f0091c106f5	Firmicutes	Faecalitalea	Absiella_dolichum	-4.08856	0.304769	0		0	1	0		3.9612	0.240971	0.131669
	3e8f5ad6bedeb6202b4cdb7ecf29e98b	Firmicutes	RF39	NA	3.96231	0.313946	0		NA	NA	NA		0	1	0
	3140cf39380dba00c815930fe127a3be	Firmicutes	RF39	NA	4.1124	0.295704	0		NA	NA	NA		-0.0136726	0.996837	0
	277baef31d2a9c480e6662402200cbaa	Firmicutes	RF39	NA	-2.65528	0.507539	0		NA	NA	NA		NA	NA	NA
	bb518fecd8ffb68f2c76deb00d50f592	Firmicutes	RF39	uncultured_bacterium	-2.05301	0.609626	0		NA	NA	NA		NA	NA	NA
	de68af3f62b2b04e42f894e18839bb57	Firmicutes	Dielma	NA	4.20218	0.285141	0		NA	NA	NA		0	1	0
	e9f900358bb9297e10b9fbb1321b1e6e	Firmicutes	Erysipelatoclostridium	[Clostridium]_spiroforme	-2.70841	0.498977	0		-3.44335	0.388198	0.0818951		-0.734932	0.82587	0
	a663a01aeb4dbb88bbe0a9840e8f64dc	Firmicutes	Erysipelatoclostridium	NA	-0.434474	0.899731	0		2.72527	0.43273	0.0730923		3.15975	0.287359	0.131669
	2e81e4d1a54e1636af43e46fa332ab11	Firmicutes	Erysipelatoclostridium	Massiliomicrobiota_timonensis	-4.27762	0.282739	0		0	1	0		4.15026	0.218968	0.131669
	6d4fe16838ce84397bd418e10a2616d0	Firmicutes	Candidatus_Stoquefichus	Candidatus_Stoquefichus	0	1	0		NA	NA	NA		NA	NA	NA
	533b6c05a74b2c25a94f884d6fe42f9d	Firmicutes	Catenibacterium	NA	0.501665	0.895966	0		3.15435	0.411031	0.0763982		2.65269	0.417599	0.101691
	822a0ee849989f75cc532cb3540de19a	Verrucomicrobiota	Victivallis	uncultured_bacterium	1.52197	0.705439	0		-5.14086	0.193548	0.108807		-6.66283	0.0476207	0.424026
	58d48f7fae77eb29ab6dc15fd07b5dfc	Verrucomicrobiota	vadinBE97	uncultured_rumen	0	1	0		NA	NA	NA		-2.96983	0.381403	0.125555
	d5135e3e52ad09c3e39312bf9236b4b7	Fusobacteriota	Cetobacterium	uncultured_bacterium	-2.59086	0.518022	0		NA	NA	NA		NA	NA	NA
	8674dcf0cfe35939037fa9a5b986866f	Fusobacteriota	Fusobacterium	NA	3.4573	0.380699	0		NA	NA	NA		NA	NA	NA
	e502ebea2a54a6f839d310d6d57e7d47	Fusobacteriota	Fusobacterium	NA	3.5908	0.362249	0		NA	NA	NA		NA	NA	NA
	f4e78e2e397dc8bd3ca2f87c245a8773	Fusobacteriota	Fusobacterium	NA	-2.32724	0.562046	0		NA	NA	NA		NA	NA	NA
	4533bf5ce3fb980fcb1a62e29b3b304b	Bacteroidota	Butyricimonas	NA	9.23561	0.018282	0.538885		3.2103	0.403177	0.0763982		-6.02531	0.0733748	0.357309
	6e7922167f1d42a455d580cabbe3c414	Bacteroidota	Butyricimonas	uncultured_bacterium	0	1	0		NA	NA	NA		-3.54725	0.294316	0.131669
	d611e03044e800bf023cfc92bec2106a	Bacteroidota	Butyricimonas	NA	-2.43971	0.543047	0		NA	NA	NA		NA	NA	NA
	25522754318cd1cc60d08721fd59e674	Bacteroidota	Butyricimonas	NA	0	1	0		NA	NA	NA		-3.17688	0.348502	0.131669
	b452284fca181520c11d087351ff43df	Bacteroidota	Butyricimonas	NA	4.74236	0.227045	0		-1.37375	0.721395	0.00576095		-6.11611	0.0691255	0.363727
	24b78b941a3182e773b893c70cecd64f	Bacteroidota	Butyricimonas	uncultured_bacterium	0	1	0		-4.95514	0.212779	0.10129		-4.84146	0.150823	0.188719
	a730ef0685ea600be854be1842a6b362	Bacteroidota	Odoribacter	NA	0.398798	0.885786	0		-2.17047	0.433931	0.0730923		-2.56927	0.27759	0.131669
	50078a5e1ee7a4bfd78aad3e3a6110c8	Bacteroidota	uncultured	uncultured_bacterium	-1.73781	0.666167	0		NA	NA	NA		NA	NA	NA
	df1e3db8a1faf4439c34564e9698099a	Bacteroidota	Coprobacter	uncultured_bacterium	0	1	0		NA	NA	NA		NA	NA	NA
	605cc047d6200f294e043f8ce6cb5af7	Bacteroidota	Coprobacter	NA	0	1	0		NA	NA	NA		NA	NA	NA
	9d88acce7b2f13b58bf95d2f17ec8c2f	Bacteroidota	Bacteroides	Bacteroides_intestinalis	-6.92498	0.0733296	0.0718496		-5.13779	0.184018	0.108807		1.78719	0.584987	0.0303397
	6616dc3bd6aeb3e26b9b2218290ea574	Bacteroidota	Bacteroides	Bacteroides_massiliensis	1.79986	0.573563	0		-1.55719	0.626227	0.0179779		-3.35705	0.218365	0.131669
	eb68fe28258fd26ecf1563beee7ccbe7	Bacteroidota	Bacteroides	NA	4.41049	0.261635	0		NA	NA	NA		-0.0136726	0.996837	0
	fd44d4cb468fd7dc9b3227867714ed87	Bacteroidota	Bacteroides	Bacteroides_vulgatus	-5.14128	0.126772	0		-5.13168	0.127482	0.156135		0.00960049	0.99733	0
	99deb3c5ecb022ec05609ebd1112a557	Bacteroidota	Bacteroides	Bacteroides_vulgatus	0.546312	0.824955	0		-1.42121	0.565009	0.031561		-1.96752	0.350271	0.131669
	d9e50a5a9a9080e7465190853575ecb0	Bacteroidota	Paraprevotella	NA	4.50373	0.251566	0		4.49006	0.253008	0.0967748		0	1	0
	bc7f3f3f3af5b386336ef880486cf17d	Bacteroidota	Paraprevotella	uncultured_bacterium	1.05783	0.784256	0		-0.111986	0.976822	0		-1.16981	0.722835	0
	45ddc69a3fbf19ff4953211c157cb9ac	Bacteroidota	Prevotella	Massiliprevotella_massiliensis	-0.169272	0.964823	0		-0.993789	0.795677	0.00576095		-0.824517	0.801103	0
	7f862b96f58f9f2a310e849bd3a65069	Bacteroidota	Prevotella	Prevotella_denticola	2.70536	0.495031	0		NA	NA	NA		NA	NA	NA
	b15193fce14759d1c06728933e044af6	Bacteroidota	Bacteroides	NA	-0.179399	0.95279	0		-2.43222	0.422121	0.0761259		-2.25283	0.383268	0.125405
	333bbf9224442fc10cd497377d2b1d01	Bacteroidota	Bacteroides	NA	-1.77152	0.538154	0		-2.03897	0.478601	0.0634516		-0.267447	0.913201	0
	9d5054752ed33d6a22bd0f96b5618b1c	Bacteroidota	Bacteroides	NA	-1.57943	0.599956	0		-0.835243	0.781525	0.00576095		0.744189	0.771948	0
	836cd5ea357ad392c00a7e48d921be1d	Bacteroidota	Bacteroides	NA	-0.201425	0.936076	0		-1.4853	0.554161	0.0336475		-1.28388	0.548769	0.0483722
	ef6a209f17415ca40777d4f3e0459647	Bacteroidota	Bacteroides	NA	-1.54382	0.59171	0		-3.72233	0.195761	0.108807		-2.17851	0.373966	0.125663
	bf611493002f5918a68778bde2def567	Bacteroidota	Bacteroides	NA	-4.09905	0.198999	0		-2.33314	0.464791	0.0634516		1.76592	0.515941	0.0605586
	1b8dec58597978264025b9eba656ffb5	Bacteroidota	Bacteroides	NA	-0.742254	0.81518	0		-2.73318	0.389276	0.0818951		-1.99093	0.46198	0.0801985
	76b39e86c95e0c7dd8b9c57b974f6532	Bacteroidota	Bacteroides	NA	-1.08889	0.744648	0		-0.734612	0.826086	0.00170827		0.354281	0.901085	0
	7ee3e4343242684ba3ce459672348ff7	Bacteroidota	Bacteroides	NA	0	1	0		-4.57342	0.250417	0.0967748		-4.45974	0.186057	0.136263
	824b9c5e131ccef5ab3286cfde31640c	Bacteroidota	Bacteroides	NA	-2.9999	0.413187	0		-3.51294	0.337923	0.0912884		-0.513034	0.869513	0
	d8e7f9181e4d5a4a6453e9ca9996a43f	Bacteroidota	Parabacteroides	Parabacteroides_merdae	0.188874	0.935297	0		-0.106294	0.963558	0		-0.295168	0.881742	0
	491f658792b4bafe4858adc66b26c448	Bacteroidota	Parabacteroides	uncultured_bacterium	4.50373	0.251566	0		4.49006	0.253008	0.0967748		0	1	0
	e7bff210eca65f9502e78f07a088e715	Bacteroidota	Parabacteroides	NA	3.50185	0.374477	0		NA	NA	NA		NA	NA	NA
	878fc53ff6f6333a92673b700951fa1b	Bacteroidota	Parabacteroides	Parabacteroides_distasonis	0.144822	0.969916	0		1.61734	0.673825	0.0113524		1.47252	0.653313	0.00727717
	9a76c2c2904fcae623e236b6818a712e	Bacteroidota	Parabacteroides	Parabacteroides_distasonis	0	1	0		-7.01724	0.077237	0.231881		-6.90359	0.0401171	0.469093
	e4ef1c7b616eb842c0ff7a327e83bd76	Bacteroidota	NA	NA	1.48671	0.699283	0		1.00808	0.793237	0.00576095		-0.478629	0.884245	0
	5551a85623ee46976e08d495fc7a7d8b	Bacteroidota	Muribaculaceae	uncultured_bacterium	-1.1274	0.780228	0		NA	NA	NA		NA	NA	NA
	02ad0bd5a96c47a9564927523818a055	Bacteroidota	Muribaculaceae	NA	-1.54601	0.701484	0		NA	NA	NA		NA	NA	NA
	2e34a69495c935c687512ce56e2020c5	Bacteroidota	Muribaculaceae	uncultured_bacterium	-0.876779	0.828301	0		NA	NA	NA		NA	NA	NA
	fee421dd182111e1d718ac10decab1e9	Bacteroidota	Alistipes	Alistipes_sp.	4.96348	0.169292	0		-2.23796	0.52603	0.0385439		-7.20145	0.0200842	0.733759
	1eaa3cb7baaac3220b0606e3621afd16	Bacteroidota	Alistipes	Alistipes_sp.	0	1	0		-6.78357	0.0709585	0.258717		-6.6699	0.0358984	0.508411
	efa231614a5eb97a385a5cae7b440348	Bacteroidota	Alistipes	Alistipes_indistinctus	0.561701	0.879054	0		0.0119345	0.997415	0		-0.549766	0.861538	0
	51d4f17b8dda9f7d972bf3dd0ecc4e59	Bacteroidota	Alistipes	Alistipes_obesi	-1.10907	0.739155	0		-2.83778	0.394076	0.0793302		-1.72871	0.54237	0.0486557
	332a6411ff00b4010ac2397f504c4695	Bacteroidota	Alistipes	uncultured_Alistipes	-1.73733	0.552579	0		-4.01148	0.17021	0.108807		-2.27415	0.361579	0.131236
	5669f9055e393154386d3ad1196d3f03	Bacteroidota	Alistipes	NA	2.96859	0.453047	0		NA	NA	NA		NA	NA	NA
	0ba1ab35f26bdef177c3341940c34c34	Bacteroidota	Alistipes	gut_metagenome	4.31082	0.272709	0		NA	NA	NA		0	1	0
	8795c5a86013864dc11f24b89e8cdd8c	Bacteroidota	Alistipes	NA	-1.46682	0.644941	0		1.31897	0.678724	0.0113524		2.78579	0.304965	0.131669
	91f0bfa8c51f250c466cda365f249c87	Bacteroidota	Alistipes	Alistipes_shahii	4.90318	0.211519	0		-1.08367	0.778424	0.00576095		-5.98685	0.0752383	0.357309
	506efac48dc5d5be2c0122c381639a3f	Bacteroidota	Alistipes	Alistipes_shahii	0.202657	0.939826	0		-2.43418	0.364292	0.0895859		-2.63684	0.249216	0.131669
	0c20afbb477e4324ad36e98180af2d52	Bacteroidota	Alistipes	NA	3.97217	0.312724	0		NA	NA	NA		0	1	0
	742e1f191223f58590661de80b9d6e3b	Bacteroidota	Alistipes	NA	-2.76653	0.426512	0		-3.21353	0.355601	0.0896435		-0.447002	0.8798	0
	b0b4dde3991e8da02f84cf77e5a35d63	Campilobacterota	Campylobacter	NA	-1.77794	0.658857	0		NA	NA	NA		NA	NA	NA
	9104e464668ba956eb9de3d3d2f9eb19	Campilobacterota	Campylobacter	Campylobacter_ureolyticus	1.15991	0.773928	0		NA	NA	NA		NA	NA	NA
	e930afd8523798f4f219b97e03115f3f	Proteobacteria	Mitochondria	Fragaria_x	0	1	0		NA	NA	NA		NA	NA	NA
	2d581b7cf56a92eb999f23d53e39125b	Proteobacteria	Mitochondria	NA	0	1	0		NA	NA	NA		NA	NA	NA
	45d802421a37735b7c9bf6825d8e0d13	Patescibacteria	TM7x	uncultured_bacterium	2.64383	0.505134	0		NA	NA	NA		NA	NA	NA
	27f098662c8f87b4aaff903d9c0f28d3	Desulfobacterota	Bilophila	NA	2.35155	0.393131	0		0.147237	0.957271	0		-2.20431	0.348363	0.131669
	31774b2ab198d7b5abc9f0d6e8a5ffc2	Desulfobacterota	Bilophila	uncultured_bacterium	-3.38886	0.396021	0		NA	NA	NA		3.26149	0.335811	0.131669
	190a5bd408491214676e65a24d192b8b	Desulfobacterota	Bilophila	uncultured_bacterium	0	1	0		NA	NA	NA		NA	NA	NA
	d09c79773d4b9e43484e592b61a6eca3	Desulfobacterota	uncultured	uncultured_Desulfovibrionaceae	2.82155	0.476249	0		NA	NA	NA		NA	NA	NA
	1c719e69d668107c05bdba29829217c5	Desulfobacterota	uncultured	uncultured_Desulfovibrionaceae	0	1	0		NA	NA	NA		NA	NA	NA
	ed66913c64e880ea0b4cf78c59280664	Desulfobacterota	Desulfovibrio	metagenome	9.28806	0.0176314	0.543041		9.27439	0.0177989	0.702983		0	1	0
	66a9101067d5d8c3ba7bb71b3043276d	Desulfobacterota	Desulfovibrio	NA	0	1	0		-3.77053	0.344209	0.0912884		-3.65684	0.279434	0.131669
	52d998a538496179968dec55950d1516	Proteobacteria	Eikenella	NA	2.85837	0.470378	0		NA	NA	NA		NA	NA	NA
	fec2da4ccc40b9ad85a020553063366b	Proteobacteria	NA	NA	4.50373	0.251566	0		4.49006	0.253008	0.0967748		-0.0136726	0.996837	0
	b600d65ed89ddbd1e326cd0b04be1d7a	Proteobacteria	NA	NA	0	1	0		NA	NA	NA		-3.40647	0.314205	0.131669
	cc1d2dabafdbc55c0a5452376a84d92c	Proteobacteria	NA	NA	0	1	0		NA	NA	NA		-3.13364	0.355219	0.131669
	69a11f927915e2a3ba1f7b9c84486527	Proteobacteria	Parasutterella	uncultured_organism	-6.38089	0.0354281	0.31523		-5.47914	0.0709003	0.258717		0.901758	0.726098	0
	4850a238b7fbbd5ffa204c5a5a396f2c	Proteobacteria	Hafnia-Obesumbacterium	NA	-3.0433	0.446641	0		NA	NA	NA		NA	NA	NA
	e47ba7bc8fb57d5a469b073c6b34ec09	Actinobacteriota	Pseudopropionibacterium	uncultured_bacterium	-1.59504	0.692408	0		NA	NA	NA		NA	NA	NA
	9c0ec4a3e0e7749c964a9ae57ba515b6	Actinobacteriota	Brooklawnia	NA	1.52191	0.70545	0		NA	NA	NA		NA	NA	NA
	2359b6a4d6a1188eac7ed4daae3e165f	Actinobacteriota	Varibaculum	NA	1.90966	0.633279	0		NA	NA	NA		NA	NA	NA
	36ce67b3fecce277df99829617975495	Actinobacteriota	Rothia	NA	2.64383	0.505134	0		NA	NA	NA		NA	NA	NA
	455219eeb206cd432bf64f51159e0b4c	Actinobacteriota	Corynebacterium	Corynebacterium_durum	-1.91636	0.633888	0		NA	NA	NA		-0.752083	0.823886	0
	33ba975cdb88b5073a2355ffdf01e9cb	Actinobacteriota	Bifidobacterium	NA	8.50424	0.0297977	0.370193		8.49056	0.0300617	0.529719		0	1	0
	315ca0a729f126b941ba111a16d4d97a	Actinobacteriota	Bifidobacterium	NA	-6.65082	0.0837842	0.0222394		1.32931	0.73068	0.00576095		7.98013	0.0152858	0.842986
	35ffcc3b809d667286737d79670b8de5	Actinobacteriota	Bifidobacterium	NA	-2.57601	0.317409	0		1.34655	0.601366	0.0217556		3.92256	0.0743179	0.357309
	5a6c87d6a4eb5e114959f6192f29b641	Actinobacteriota	Bifidobacterium	NA	-3.13927	0.376186	0		-0.845944	0.811534	0.00310969		2.29332	0.448354	0.0864826
	df8456a1abbfb4c8a2c450b44378d4cb	Actinobacteriota	Actinomyces	Schaalia_odontolytica	1.2661	0.673582	0		2.15654	0.473843	0.0634516		0.890439	0.729631	0
	75a3e20e916ee5ec7dceae34a1bc0209	Actinobacteriota	Actinomyces	NA	5.16604	0.187835	0		5.15236	0.189006	0.108807		0	1	0
	0ed3a6836e138f14044f6950ad7280d2	Actinobacteriota	Actinomyces	NA	0	1	0		NA	NA	NA		NA	NA	NA
	366bb3ddd63d135bec172051cf2cfe0a	Actinobacteriota	Actinomyces	Actinomyces_graevenitzii	0.245882	0.949754	0		3.21989	0.414872	0.0761259		2.97401	0.380973	0.125555
	a9cd5db356d9044d10650f04f528a737	Actinobacteriota	NA	NA	4.08806	0.298611	0		NA	NA	NA		0	1	0
	970b8c4828f3cc86fab57e48bb8fad63	Actinobacteriota	Olsenella	NA	-1.54601	0.701484	0		NA	NA	NA		NA	NA	NA
	f9612c98d79c37a803a973724113cef6	Actinobacteriota	Atopobium	uncultured_bacterium	0.758073	0.845766	0		2.02901	0.605817	0.0217556		1.27094	0.707508	0
	5c8ab304c9598e43323adcc4607c798a	Actinobacteriota	Atopobium	NA	2.96859	0.453047	0		NA	NA	NA		NA	NA	NA
	0b9bfdf64ae4d75efe841e54d6d5682f	Actinobacteriota	Olsenella	uncultured_Olsenella	4.20374	0.28496	0		NA	NA	NA		0	1	0
	14cdbeb53b04b38471da15fcf8b01f92	Actinobacteriota	Olsenella	Olsenella_sp.	2.96859	0.453047	0		NA	NA	NA		NA	NA	NA
	7427cc5ba277f690df113d56e5c6b538	Actinobacteriota	uncultured	uncultured_bacterium	0	1	0		NA	NA	NA		NA	NA	NA
	43a906342bc660845c902048afaa1bbc	Actinobacteriota	NA	NA	3.96231	0.313946	0		NA	NA	NA		0	1	0
	3114d42cc9f862a2a18d7e5efde7fa9b	Actinobacteriota	Slackia	NA	0.765919	0.841859	0		0.24334	0.949451	0		-0.522578	0.873197	0
	e673dc964cf400af5e4dbeb2991f4b11	Actinobacteriota	Slackia	Slackia_exigua	-1.97927	0.62267	0		NA	NA	NA		NA	NA	NA
	415fd27fb6fe55740f3c2dfa7ee270c8	Actinobacteriota	Enterorhabdus	uncultured_bacterium	-1.1274	0.780228	0		NA	NA	NA		NA	NA	NA
	046b551e1381cc94ff6f1e3da6a20be5	Actinobacteriota	Enterorhabdus	uncultured_bacterium	-1.54601	0.701484	0		NA	NA	NA		NA	NA	NA
	b8f3e25d11280a9e2189700e107de07c	Actinobacteriota	Enterorhabdus	uncultured_bacterium	7.81333	0.0459389	0.231042		1.20515	0.753649	0.00576095		-6.60818	0.0494795	0.419656
	ca72a089674006d2e9cade617df3d5d7	Actinobacteriota	Gordonibacter	NA	-3.08736	0.31309	0		-2.68877	0.379804	0.084215		0.398594	0.876898	0
	dffd7d5e83db17c6c0bce2832d77bec0	Actinobacteriota	NA	NA	-3.97769	0.318208	0		-2.4761	0.53694	0.0348721		1.50159	0.652945	0.00727717
	ad71b192343facecd54843bccb0470da	Actinobacteriota	NA	NA	3.30867	0.401909	0		NA	NA	NA		NA	NA	NA
	629f41c0de31ba20f5d2b3f4c69e09c1	Actinobacteriota	Eggerthella	uncultured_bacterium	-1.50707	0.644524	0		-0.871726	0.789596	0.00576095		0.63534	0.819473	0
	4a4230232fbfa3b8cfd2cae77dc6feac	Actinobacteriota	Raoultibacter	Raoultibacter_timonensis	0	1	0		NA	NA	NA		NA	NA	NA
	871b99772b7ead3ed8a217f566729af6	Actinobacteriota	uncultured	gut_metagenome	-7.30302	0.040424	0.270926		-5.83956	0.101533	0.168618		1.46346	0.615979	0.0142832
	422443b7e46f6631c5a7cc89316be0d0	Actinobacteriota	uncultured	uncultured_bacterium	4.13986	0.292445	0		NA	NA	NA		0	1	0
	eec7701a5684609b085e8c2b7b65b1f1	Actinobacteriota	uncultured	NA	0	1	0		NA	NA	NA		NA	NA	NA
	a1797bde05fdcb6f5aeab533c9386803	Actinobacteriota	uncultured	NA	0	1	0		NA	NA	NA		-3.47932	0.303805	0.131669
	6ab475426af806ca2528a3b20d77cde8	Actinobacteriota	uncultured	uncultured_organism	2.22414	0.576773	0		NA	NA	NA		NA	NA	NA
	c7710d6f144476667c42e65e2ec71053	Actinobacteriota	uncultured	NA	5.63409	0.150634	0		-1.24362	0.746374	0.00576095		-6.87771	0.0408721	0.469093
	35cbb315e019e0a8768d4b73862df415	Actinobacteriota	Collinsella	NA	0.360572	0.903019	0		0.247455	0.933356	0		-0.113117	0.964249	0
	9a67e1965fe9ce8fed8d8fbe40c3ec36	Actinobacteriota	Collinsella	NA	0	1	0		NA	NA	NA		-3.25342	0.336813	0.131669
	e78d28b0c959b6e035caad98e3288205	Cyanobacteria	Chloroplast	NA	0	1	0		NA	NA	NA		NA	NA	NA
	9e701e82d552ee66d9007fa3883b6560	Cyanobacteria	Chloroplast	NA	-2.47531	0.5371	0		NA	NA	NA		NA	NA	NA
	4a0b292ba716582f9af46694458c0b9b	Cyanobacteria	Chloroplast	NA	-1.73781	0.666167	0		NA	NA	NA		NA	NA	NA
	a0d16414f352e45bb94592a4cfdd6c37	Cyanobacteria	Gastranaerophilales	NA	-3.51655	0.378232	0		NA	NA	NA		3.38919	0.316907	0.131669
	b6b86531ef8d5b24a2b1f0d0cbb40c76	Cyanobacteria	Gastranaerophilales	NA	0	1	0		-4.99914	0.20872	0.10129		-4.88547	0.147114	0.188719
	10e51791c8dee561db8251780cf9ef0d	Cyanobacteria	Gastranaerophilales	Clostridium_sp.	0	1	0		NA	NA	NA		NA	NA	NA
	8624322ae2483faffff421f46f814fc2	Synergistota	Pyramidobacter	Pyramidobacter_piscolens	2.64383	0.505134	0		NA	NA	NA		NA	NA	NA
	3b010dbd9eae72a79f11af5d24eb3ca3	Verrucomicrobiota	Akkermansia	uncultured_organism	-0.1137	0.977569	0		NA	NA	NA		NA	NA	NA
	07b148ebe6cc2c05b1faa8d187c51114	Verrucomicrobiota	Akkermansia	NA	0	1	0		NA	NA	NA		-3.63851	0.281887	0.131669
	6ba98911efd5b1fa1cbba9f869562cce	Synergistota	Cloacibacillus	Cloacibacillus_evryensis	4.59131	0.242358	0		3.75325	0.339218	0.0912884		-0.838065	0.807997	0
	6bbff26a22040581ff0e24f9b5b40830	Firmicutes	Acidaminococcus	uncultured_organism	-1.15285	0.763989	0		-1.68756	0.660271	0.0125879		-0.534715	0.870234	0
	96cf4779be686036f92ee15e58b72d52	Firmicutes	Phascolarctobacterium	uncultured_Veillonellaceae	0.235527	0.95105	0		1.83782	0.631949	0.0161747		1.60229	0.624382	0.00997508
	db11ebab656f855d357867467f755ec1	Firmicutes	Anaeroglobus	Anaeroglobus_geminatus	4.44124	0.258284	0		NA	NA	NA		0	1	0
	b022b5312f30be684bdd2cc66030dea5	Firmicutes	Veillonella	Veillonella_sp.	-2.72867	0.495732	0		NA	NA	NA		NA	NA	NA
	2740cf2417c92847cc298cbd71dd1fcd	Firmicutes	Veillonella	NA	-3.05107	0.407254	0		-2.4597	0.504138	0.0501662		0.591371	0.849973	0
	cd9401a6bce4a63af516d06d2a843f9d	Firmicutes	Veillonella	NA	-1.33849	0.727532	0		-0.0627834	0.986966	0		1.27571	0.696974	0
	7a6dba47692f821cabeaf266b6b36593	Firmicutes	NA	NA	-1.21213	0.754993	0		3.20137	0.417615	0.0761259		4.4135	0.190806	0.131669
	c83c84c8f82639c3bcb16c5630f257b2	Firmicutes	Dialister	NA	-0.113707	0.977568	0		NA	NA	NA		NA	NA	NA
	818434292143daca42a3168f3728da82	Firmicutes	Dialister	NA	-6.03753	0.116196	0		-4.27608	0.26589	0.0967748		1.76145	0.590348	0.0279772
	22b3c70cdfb1714224e1bf8a6314bee9	Firmicutes	Finegoldia	uncultured_bacterium	0.0441386	0.991153	0		NA	NA	NA		0.0312026	0.992681	0
	e93b313352019b8113e7fc66bf757917	Firmicutes	Parvimonas	NA	-1.77146	0.660036	0		NA	NA	NA		NA	NA	NA
	1f761e94c83ae87caff68f7dcd11e34c	Firmicutes	Parvimonas	NA	-1.62324	0.687196	0		NA	NA	NA		NA	NA	NA
	b2574632cd105083065793a728d40c81	Firmicutes	Peptoniphilus	NA	3.06431	0.438293	0		NA	NA	NA		NA	NA	NA
	583ff9cd11ab989e8d47f61ad9b5c0b6	Firmicutes	Peptococcus	uncultured_organism	2.38943	0.542798	0		NA	NA	NA		1.41862	0.679723	0.00200633
	7e02d8db5f57fe608ac0d706fefb07c1	Firmicutes	Peptococcus	NA	0	1	0		-4.85345	0.222379	0.0967748		-4.73977	0.159667	0.176268
	b871d9992cf3c16ed6ab1604ffff5ed4	Firmicutes	Anaerofustis	uncultured_Eubacteriaceae	2.82155	0.476249	0		NA	NA	NA		NA	NA	NA
	bff072be6820bb768214374ffe47a137	Firmicutes	Anaerofustis	Anaerofustis_sp.	1.86116	0.642182	0		NA	NA	NA		NA	NA	NA
	8f8ff8009eb606b59b707de95a57cd2a	Firmicutes	Christensenellaceae_R-7_group	uncultured_soil	-3.25372	0.41539	0		NA	NA	NA		3.12635	0.356593	0.131669
	a72bc4bbcb65e31aac628de5b9a9b0af	Firmicutes	Christensenellaceae_R-7_group	uncultured_marine	-2.70968	0.47948	0		-2.94704	0.440984	0.0730923		-0.237367	0.940855	0
	4cdc5b820b31c7b2c0720f917d9cd3f7	Firmicutes	Christensenellaceae_R-7_group	uncultured_bacterium	3.30869	0.401905	0		NA	NA	NA		-2.33192	0.494098	0.0715501
	3723ea6e099f53017ca85c153c80969f	Firmicutes	uncultured	uncultured_Peptococcaceae	-2.83346	0.479099	0		NA	NA	NA		NA	NA	NA
	f65fe04b0921a77bacea7992c72b38d8	Firmicutes	Christensenellaceae_R-7_group	NA	3.30867	0.401909	0		NA	NA	NA		NA	NA	NA
	32946a13151283c45561a1d0ca4223a0	Firmicutes	Christensenellaceae_R-7_group	metagenome	0	1	0		-4.10015	0.303272	0.0920477		-3.98646	0.23781	0.131669
	000db46fcff4701589d112bc2a6044de	Firmicutes	Christensenellaceae_R-7_group	NA	0	1	0		-4.09992	0.303298	0.0920477		-3.98624	0.237837	0.131669
	4bdbaae586dedec92168f93266de0979	Firmicutes	Christensenellaceae_R-7_group	uncultured_bacterium	0	1	0		-5.19809	0.191069	0.108807		-5.08442	0.131216	0.218333
	45aea834beb1b1b53d8db337520b771e	Firmicutes	Christensenellaceae_R-7_group	NA	1.74218	0.655867	0		NA	NA	NA		2.0687	0.54493	0.0486557
	f49d2848d32dfc6bda35654085f64dc0	Firmicutes	Christensenellaceae_R-7_group	NA	0	1	0		NA	NA	NA		-3.13825	0.354499	0.131669
	7c9bba28743eed0421bf944baafce708	Firmicutes	Christensenellaceae_R-7_group	NA	0	1	0		NA	NA	NA		NA	NA	NA
	c66ec67719e54d2cb0afc3154b3c23af	Firmicutes	Christensenellaceae_R-7_group	NA	0.397312	0.917708	0		-2.00383	0.601966	0.0217556		-2.40114	0.463804	0.0801985
	a59281c2e5b485694bad1587ee5e4e6a	Firmicutes	Christensenellaceae_R-7_group	uncultured_prokaryote	-2.84104	0.477904	0		-3.90985	0.326491	0.0912884		-1.06881	0.748277	0
	98733e7d335f309921890faeea796c8c	Firmicutes	Christensenellaceae_R-7_group	uncultured_prokaryote	-0.0959162	0.980064	0		1.11743	0.771005	0.00576095		1.21335	0.710979	0
	b621d4b3cca1ec89ceca12efca8a94fb	Firmicutes	Christensenellaceae_R-7_group	uncultured_prokaryote	-0.785666	0.788927	0		-2.46115	0.401346	0.0763982		-1.67548	0.502429	0.0682752
	94928715987dcb9638dd5c0e8f9b20f4	Firmicutes	Christensenellaceae_R-7_group	NA	0	1	0		-6.3844	0.108009	0.161687		-6.27074	0.0623563	0.369331
	b1162bcb5e03ffb9e3911aec18b6f761	Firmicutes	Christensenellaceae_R-7_group	NA	2.64386	0.505129	0		NA	NA	NA		-3.13724	0.354658	0.131669
	a7e28b3f4879359a929a0da8c8557757	Firmicutes	Clostridia_vadinBB60_group	uncultured_organism	-4.06776	0.307261	0		-3.73057	0.349404	0.0912884		0.337193	0.918857	0
	1bd30619a34ac3a426a47f26cb8d5c1b	Firmicutes	Clostridium_sensu_stricto_1	NA	2.22625	0.576401	0		NA	NA	NA		NA	NA	NA
	1d49df56b83a383d8b998af9d148f52c	Firmicutes	Clostridium_sensu_stricto_1	NA	3.0643	0.438295	0		NA	NA	NA		NA	NA	NA
	22424eb53c259749d0d5cf4f45d18613	Firmicutes	Clostridium_sensu_stricto_1	NA	4.20374	0.28496	0		NA	NA	NA		-0.0136726	0.996837	0
	40874d61006874f7c87d904707d320d9	Firmicutes	Clostridium_sensu_stricto_1	NA	0.147044	0.963343	0		-0.844463	0.791802	0.00576095		-0.991506	0.716299	0
	9acb555d3c5dd77e9035a661e7ad1bb6	Firmicutes	Clostridium_sensu_stricto_1	NA	0.596383	0.82095	0		-0.946507	0.719401	0.00576095		-1.54289	0.492332	0.0715501
	74aaeb93ba19830fa0e2cc55966371bd	Firmicutes	DTU014	unidentified	0	1	0		-5.46824	0.137972	0.128853		-5.35455	0.0860906	0.329339
	90af3675c266d09bb7986147ac5885ec	Firmicutes	Christensenellaceae_R-7_group	human_gut	8.10623	0.0167869	0.552457		1.34416	0.684069	0.0113524		-6.76207	0.020581	0.732291
	9e0326554068ca2dfdaf5f8ab043fea8	Firmicutes	uncultured	uncultured_bacterium	0	1	0		NA	NA	NA		NA	NA	NA
	81b0af5710b83eca45bef65a75f7794f	Firmicutes	Christensenellaceae_R-7_group	gut_metagenome	4.31082	0.272709	0		NA	NA	NA		0	1	0
	bee32501a08f41caec4ee141e31341cd	Firmicutes	Christensenellaceae_R-7_group	gut_metagenome	0	1	0		NA	NA	NA		NA	NA	NA
	970061e73ce91ac85fddf205224d8322	Firmicutes	Christensenellaceae_R-7_group	uncultured_Clostridium	0	1	0		NA	NA	NA		NA	NA	NA
	3ade68e0c8fce8bb5c9ee9a3252de7f1	Firmicutes	Clostridia_vadinBB60_group	metagenome	0	1	0		NA	NA	NA		NA	NA	NA
	ff07c23372bce6dfd729af5aff5a566c	Firmicutes	Clostridia_vadinBB60_group	metagenome	0	1	0		NA	NA	NA		NA	NA	NA
	b7ca3fe095a2596b5c9875dc8cba3ba9	Firmicutes	uncultured	uncultured_bacterium	3.96231	0.313946	0		NA	NA	NA		0	1	0
	9f7720d3cc7e4078296706071455e451	Firmicutes	uncultured	metagenome	0	1	0		NA	NA	NA		NA	NA	NA
	b6ed1fda48450bc73938e1aad922a581	Firmicutes	uncultured	uncultured_bacterium	0	1	0		NA	NA	NA		NA	NA	NA
	2a8aea91e4fcf825e2983d6f8e66436d	Firmicutes	Papillibacter	uncultured_bacterium	3.08557	0.435054	0		NA	NA	NA		NA	NA	NA
	8c62cff696104ab3d473ea9b18d3de5b	Firmicutes	Clostridia_UCG-014	gut_metagenome	-2.74848	0.492572	0		NA	NA	NA		NA	NA	NA
	e0f7bdf2974c6f61534b16e0886f6670	Firmicutes	Clostridia_UCG-014	uncultured_Ruminococcaceae	0	1	0		-6.07652	0.126153	0.156135		-5.96285	0.0764207	0.356366
	07c12b6798d5d42cae24bacb642110ee	Firmicutes	Clostridia_UCG-014	NA	2.96859	0.453047	0		NA	NA	NA		NA	NA	NA
	636662482cd35ffe19881dbcc0daa9e4	Firmicutes	Clostridia_UCG-014	NA	0	1	0		NA	NA	NA		-3.40647	0.314205	0.131669
	1f6ec30d82fcef8eeb5377d5c4143538	Firmicutes	Clostridia_UCG-014	NA	0	1	0		-6.31617	0.11184	0.161687		-6.20251	0.0652723	0.369331
	eb51a6482b09f0c5962e362d2d23abb9	Firmicutes	Clostridia_UCG-014	NA	6.08324	0.120518	0		-0.0577742	0.98801	0		-6.14101	0.0679961	0.363727
	08c53fdf2c7b879ac5e38d5730b65fd9	Firmicutes	Christensenellaceae_R-7_group	bacterium_YE57	0	1	0		-5.36299	0.177297	0.108807		-5.24931	0.119082	0.228189
	ca164e68ce5db67ae0182d9c3bafc5fa	Firmicutes	Christensenellaceae_R-7_group	bacterium_YE57	2.96859	0.453047	0		NA	NA	NA		NA	NA	NA
	af6e86990c391c8aac76e4fe452fbbd5	Firmicutes	Monoglobus	uncultured_bacterium	0	1	0		-4.77917	0.229586	0.0967748		-4.66549	0.166373	0.172156
	14568a3e57b3562e1a4767adee3b2614	Firmicutes	Monoglobus	uncultured_bacterium	0	1	0		NA	NA	NA		NA	NA	NA
	787ab1672520289680427986b59e3417	Firmicutes	Clostridia_vadinBB60_group	uncultured_organism	0	1	0		-5.52149	0.164773	0.108807		-5.40782	0.108268	0.259263
	4f6fdf99f33f2cfc14e22239452979c2	Firmicutes	Clostridia_vadinBB60_group	NA	0	1	0		NA	NA	NA		-3.40647	0.314205	0.131669
	d539f803d65357ebbff06d49e16a05f5	Firmicutes	Clostridia_vadinBB60_group	uncultured_bacterium	-3.51655	0.378232	0		NA	NA	NA		3.38919	0.316907	0.131669
	8bd1adac0f0c525654b403f629f356c3	Firmicutes	Clostridia_vadinBB60_group	uncultured_bacterium	0	1	0		NA	NA	NA		NA	NA	NA
	9e18b43f389956ba5ac3ddf810f39cb6	Firmicutes	Clostridia_vadinBB60_group	uncultured_bacterium	0	1	0		-4.65682	0.241818	0.0967748		-4.54314	0.177879	0.147816
	fbb2ccdf9eee6835b98ab9fad97f117a	Firmicutes	Clostridia_vadinBB60_group	gut_metagenome	0	1	0		NA	NA	NA		-3.32986	0.325393	0.131669
	74e51a1db8a0606b60af52ef6b196462	Firmicutes	Clostridia_vadinBB60_group	gut_metagenome	0	1	0		NA	NA	NA		-3.25342	0.336813	0.131669
	e5d5579394f57557a5a7d9c83314c541	Firmicutes	Clostridia_vadinBB60_group	uncultured_bacterium	0	1	0		NA	NA	NA		-3.2524	0.336967	0.131669
	86dbd7abcc884e0486ff0f450e03260c	Firmicutes	Clostridia_vadinBB60_group	uncultured_bacterium	0	1	0		NA	NA	NA		NA	NA	NA
	1a9df3fbbc7fc8cecec4239cf801d2fc	Firmicutes	Monoglobus	NA	-0.232141	0.922985	0		-1.96875	0.411812	0.0763982		-1.73661	0.395769	0.118
	c9dc631cba3eb5fec2dffe2631f3c73a	Firmicutes	Monoglobus	uncultured_bacterium	0	1	0		NA	NA	NA		NA	NA	NA
	dd71867e455c06df8ce492f946ce44a3	Firmicutes	Monoglobus	NA	-1.7288	0.667812	0		NA	NA	NA		NA	NA	NA
	24fd2a10eaa6a9a9b39b28ec9d631a69	Firmicutes	Ruminiclostridium	uncultured_Clostridiaceae	-3.25372	0.41539	0		NA	NA	NA		3.12635	0.356593	0.131669
	498c651850e939b413ce7828dcbd496e	Firmicutes	Monoglobus	uncultured_bacterium	3.30867	0.401909	0		NA	NA	NA		NA	NA	NA
	e2cfe099d4a73a03ac5f80d4f8369dbc	Firmicutes	NK4A214_group	metagenome	-0.8896	0.755943	0		-2.81317	0.325423	0.0912884		-1.92357	0.430036	0.0959473
	7e7d68f511a7019ad4a8d6b9b8138e34	Firmicutes	Colidextribacter	uncultured_Clostridia	-4.44404	0.264268	0		0	1	0		4.31668	0.200834	0.131669
	d0a595d01b18ef4d949bf1de47b08daa	Firmicutes	Colidextribacter	uncultured_Clostridia	0	1	0		NA	NA	NA		NA	NA	NA
	5a995ef0ef454381562fe4d6909fa8d4	Firmicutes	Colidextribacter	uncultured_Clostridia	-2.90746	0.467508	0		NA	NA	NA		NA	NA	NA
	c5ec23b5e73a33133aa0fcf9acd58650	Firmicutes	Colidextribacter	Colidextribacter_massiliensis	0	1	0		NA	NA	NA		NA	NA	NA
	c072b53a13bb032cf7ebd84b996bb18f	Firmicutes	Colidextribacter	Colidextribacter_massiliensis	-3.84391	0.334937	0		0	1	0		3.71655	0.271708	0.131669
	ea52488235f530227f65a4c6e3b27aab	Firmicutes	Intestinimonas	uncultured_bacterium	0	1	0		NA	NA	NA		NA	NA	NA
	f98dab4619ff896a9cee45a9b9ddc792	Firmicutes	uncultured	Clostridium_sp.	0	1	0		NA	NA	NA		-3.28335	0.33231	0.131669
	96d32e0a9080b946476b289db6a57f65	Firmicutes	uncultured	NA	0	1	0		NA	NA	NA		NA	NA	NA
	5fbc483f79cd97d3a7253931f37c33e8	Firmicutes	Flavonifractor	uncultured_bacterium	-1.6961	0.560566	0		-0.168055	0.954074	0		1.52804	0.538434	0.0500246
	5c4fd1d0cbe7b43a93c2ed9286af0847	Firmicutes	Flavonifractor	uncultured_bacterium	0	1	0		NA	NA	NA		NA	NA	NA
	50c2e92f3b001c0f07a654b597605f95	Firmicutes	Flavonifractor	uncultured_bacterium	-3.24381	0.416832	0		-2.91388	0.466288	0.0634516		0.329932	0.921281	0
	3443b73db214fbccce540ddb43380a8d	Firmicutes	Pseudoflavonifractor	uncultured_bacterium	0	1	0		NA	NA	NA		NA	NA	NA
	cc7b0c4fe7613151aee46e9be3ea14a9	Firmicutes	NA	NA	6.55202	0.0943581	0		6.53835	0.0950475	0.179554		0	1	0
	e657205bc51c1db7e6a38c33a084749d	Firmicutes	uncultured	uncultured_rumen	-1.57587	0.682128	0		-0.0476294	0.990133	0		1.52824	0.641345	0.00822296
	48120f2d28136884787660eb4953652a	Firmicutes	Intestinimonas	uncultured_bacterium	0	1	0		NA	NA	NA		NA	NA	NA
	8d5153b41e59c5ffb5a1fc080eb784cf	Firmicutes	uncultured	NA	-4.95095	0.125059	0		-7.36069	0.0222467	0.620349		-2.40974	0.357141	0.131669
	73cd1c10175eb846badd2f34bd86dd08	Firmicutes	Intestinimonas	Intestinimonas_butyriciproducens	0	1	0		-4.57623	0.250124	0.0967748		-4.46255	0.185777	0.136263
	40ac3979c05fe30df6ecfaaa78ae3e9f	Firmicutes	UCG-009	NA	3.91663	0.319643	0		NA	NA	NA		0	1	0
	213c1471e152469931a574877d6e1ad3	Firmicutes	UCG-009	uncultured_organism	0	1	0		NA	NA	NA		NA	NA	NA
	bdb6ddef008a6d31c019642fb28d7c1d	Firmicutes	Colidextribacter	NA	-1.39341	0.648647	0		-1.70959	0.575915	0.0258206		-0.316181	0.902942	0
	350cd8e890b27c7fa7ec3a0d77dbaa9b	Firmicutes	Colidextribacter	NA	-2.83346	0.479099	0		NA	NA	NA		NA	NA	NA
	1a7a9d14747af9f14fcdabdef2549a77	Firmicutes	Colidextribacter	NA	-1.00882	0.753617	0		-1.08028	0.736705	0.00576095		-0.071453	0.979114	0
	61b3f9c4a322ffd5403d7b8eab09e168	Firmicutes	uncultured	uncultured_organism	0	1	0		NA	NA	NA		-3.16183	0.350832	0.131669
	13e5e67a2599db5c3cdfa82c4c9ea6fd	Firmicutes	NA	NA	0	1	0		NA	NA	NA		-3.5026	0.300531	0.131669
	eed2ad9c2d5b732094c15f0902f14d2c	Firmicutes	UCG-005	uncultured_rumen	0	1	0		NA	NA	NA		-3.20075	0.344829	0.131669
	c5bbe83eefb639e05548b52ee3aae3c6	Firmicutes	UCG-005	uncultured_rumen	0	1	0		-3.90988	0.326487	0.0912884		-3.79619	0.261265	0.131669
	0f603a9018080b298f6f858569d3b3e2	Firmicutes	UCG-005	uncultured_organism	0	1	0		-5.52084	0.164822	0.108807		-5.40717	0.108311	0.259263
	4bd01f90398375480101204bbcdd2ceb	Firmicutes	UCG-005	uncultured_organism	1.87211	0.626158	0		1.97911	0.606565	0.0217556		0.107	0.973999	0
	b2506d7e0328de8e0b8e68da4f7fad5e	Firmicutes	UCG-005	uncultured_organism	0	1	0		NA	NA	NA		-3.45936	0.306631	0.131669
	c2da7cc0247443dccd2e3d6a62f7be45	Firmicutes	UCG-005	gut_metagenome	-5.79017	0.145118	0		-6.14809	0.121736	0.161687		-0.357922	0.913131	0
	aa9c49ba481ae61591972fc4e6bfa3d4	Firmicutes	UCG-005	metagenome	0	1	0		-3.98403	0.317305	0.0920477		-3.87034	0.25194	0.131669
	3b951c1f21c92bc555de6b5c536eca3d	Firmicutes	UCG-005	metagenome	4.20374	0.28496	0		NA	NA	NA		0	1	0
	00b2c18e2b09368b6f38d0d58e3bcae2	Firmicutes	UCG-005	metagenome	0	1	0		NA	NA	NA		NA	NA	NA
	afa3e197ab31aa17a760b9a076eb42f3	Firmicutes	UCG-005	NA	0	1	0		NA	NA	NA		NA	NA	NA
	32cc17e12d08b4011ab0ec8c393fd12c	Firmicutes	UCG-002	gut_metagenome	-0.879382	0.818808	0		2.29405	0.550611	0.0342617		3.17343	0.333132	0.131669
	09d981dc93a29f773c4d5167829257ec	Firmicutes	Oscillibacter	NA	-3.0433	0.446641	0		NA	NA	NA		NA	NA	NA
	3120660c883750285d85c12f7d898f67	Firmicutes	Oscillibacter	NA	-0.0689765	0.983347	0		-2.04513	0.534813	0.0348721		-1.97615	0.481736	0.0715501
	77c2dc197e6b3dbebc4ee240c6a1c559	Firmicutes	Oscillibacter	NA	-1.91299	0.505803	0		-3.47942	0.225556	0.0967748		-1.56644	0.518899	0.0605586
	7d4a5bce832b90560fefa4a3727807a4	Firmicutes	Oscillospira	uncultured_organism	0	1	0		-4.36228	0.273139	0.0967748		-4.2486	0.208006	0.131669
	c26af4c22f01bb994a68df0c15a529a3	Firmicutes	Oscillospira	uncultured_bacterium	0	1	0		NA	NA	NA		-3.32986	0.325393	0.131669
	96e70019ca7b8f4dd4d83d68fc4cc52b	Firmicutes	Oscillibacter	Oscillibacter_sp.	0	1	0		NA	NA	NA		NA	NA	NA
	d0833ce681acbdd482a03911d447756d	Firmicutes	UCG-003	NA	0	1	0		-4.1408	0.298458	0.0920477		-4.02711	0.232999	0.131669
	5d08d1eb4b8a0672652dd0fc0af2dcf0	Firmicutes	UCG-003	NA	0.273546	0.918365	0		-3.14878	0.236478	0.0967748		-3.42233	0.131617	0.218333
	3dc8691f4274fac77b91e66df1bd9aad	Firmicutes	UCG-003	uncultured_bacterium	0	1	0		NA	NA	NA		-3.08573	0.362757	0.131236
	68d79c3035521e82b504b081a197d2ed	Firmicutes	UCG-002	NA	-7.56238	0.0410164	0.270926		-7.73539	0.0365954	0.46913		-0.173011	0.954554	0
	9192b3275c36e56540678451adfa601f	Firmicutes	UCG-002	uncultured_organism	2.55449	0.438794	0		-2.21867	0.500734	0.0501662		-4.77315	0.0898924	0.319278
	3219af75ee8056ed06ba81e873b0d0cb	Firmicutes	UCG-002	uncultured_rumen	-4.45708	0.208422	0		-3.36471	0.342396	0.0912884		1.09237	0.716209	0
	cf4a3714646f3c97bb3489da222228b7	Firmicutes	NA	NA	0	1	0		NA	NA	NA		-3.13364	0.355219	0.131669
	a7db077ae09ab481473ac2445474128f	Firmicutes	UCG-010	uncultured_bacterium	0	1	0		NA	NA	NA		-3.25342	0.336813	0.131669
	52ca86ec48d4b050235dcfdea9cd5d39	Firmicutes	UCG-010	NA	0	1	0		-4.23415	0.2876	0.0920477		-4.12047	0.222215	0.131669
	7a46ee3b9195b8148ad7b55208cb0e25	Firmicutes	UCG-010	uncultured_bacterium	0	1	0		NA	NA	NA		NA	NA	NA
	72692f8860dd25e796abdda278878b79	Firmicutes	UCG-010	gut_metagenome	0	1	0		-6.16513	0.120702	0.161687		-6.05146	0.0721295	0.357662
	e35e7d4cf6b6c4837a7bf77ca88c05ca	Firmicutes	UCG-010	uncultured_bacterium	0	1	0		NA	NA	NA		NA	NA	NA
	a9973ca59e47373fd5b3b1cfdf2611a6	Firmicutes	UCG-010	uncultured_bacterium	0	1	0		NA	NA	NA		NA	NA	NA
	7327a55af477aa89dc73611f2806c3e9	Firmicutes	UCG-010	uncultured_bacterium	0	1	0		NA	NA	NA		-3.13825	0.354499	0.131669
	34b791a0a48d68bbf6278d510ee36430	Firmicutes	UCG-010	gut_metagenome	2.08073	0.602267	0		NA	NA	NA		-3.28358	0.332276	0.131669
	71f4d7830594809728704c5814777de2	Firmicutes	UCG-010	gut_metagenome	0	1	0		NA	NA	NA		-3.32986	0.325393	0.131669
	f98aff248d7f6d3d2273fdba745f43fd	Firmicutes	UCG-010	metagenome	0	1	0		NA	NA	NA		NA	NA	NA
	3f9afe17105dd0c33bf41ce08824f362	Firmicutes	Butyricicoccus	uncultured_organism	0	1	0		NA	NA	NA		-3.36738	0.319882	0.131669
	6d52536b55ab19ff41c247db9d081d01	Firmicutes	Butyricicoccus	uncultured_bacterium	-3.23854	0.417599	0		NA	NA	NA		3.11118	0.358977	0.131669
	3f6dce06719bb11b6b9bbb8f2c8a5644	Firmicutes	Butyricicoccus	uncultured_bacterium	5.17935	0.186689	0		-0.762672	0.842947	0.00124597		-5.94203	0.077459	0.356258
	a18c0c17fce3d52dc60506e8730bc996	Firmicutes	Butyricicoccus	NA	-2.39712	0.29209	0		-3.53014	0.120645	0.161687		-1.13302	0.557591	0.0463351
	d969ff7a11c25dc9b04c6eb48a6ec8c3	Firmicutes	[Eubacterium]_coprostanoligenes_group	NA	4.50373	0.251566	0		4.49006	0.253008	0.0967748		0	1	0
	1c53272c33799c6309d6128a1114d129	Firmicutes	[Eubacterium]_coprostanoligenes_group	NA	0	1	0		NA	NA	NA		NA	NA	NA
	0dcf5023e96fb8175d7bf02d900c9dd1	Firmicutes	[Eubacterium]_coprostanoligenes_group	NA	3.07865	0.423096	0		-1.93951	0.613275	0.021359		-5.01816	0.125893	0.220429
	d28154720fe4e935645db398926ded1f	Firmicutes	[Eubacterium]_coprostanoligenes_group	gut_metagenome	-2.74848	0.492572	0		NA	NA	NA		NA	NA	NA
	3f49f2e33639f81618c76b5807f6498c	Firmicutes	[Eubacterium]_coprostanoligenes_group	metagenome	0.721714	0.850963	0		0.276398	0.942624	0		-0.445316	0.891898	0
	caee94af7a4562c61da6712807157dc9	Firmicutes	[Eubacterium]_coprostanoligenes_group	uncultured_rumen	0	1	0		NA	NA	NA		NA	NA	NA
	55beed6d1a19ce34788b66488ffe3917	Firmicutes	uncultured	gut_metagenome	7.7052	0.0490366	0.220802		1.47025	0.701876	0.00839115		-6.23495	0.063872	0.369331
	f94b14e11dfe405e48976839ca380380	Firmicutes	Candidatus_Soleaferrea	Ruminococcaceae_bacterium	-0.115423	0.976293	0		1.29179	0.741156	0.00576095		1.40721	0.67404	0.00200633
	4ac43ecbe6347d46a2ab5a31ffd64c25	Firmicutes	Candidatus_Soleaferrea	uncultured_Anaerotruncus	0	1	0		NA	NA	NA		NA	NA	NA
	f801c7a8ac9c5fbba79b652ac9d82a13	Firmicutes	uncultured	uncultured_organism	-2.44597	0.541999	0		NA	NA	NA		NA	NA	NA
	ea00763b3eff28e6e109d14cb2cff8d5	Firmicutes	Anaerofilum	uncultured_bacterium	-3.05884	0.444289	0		NA	NA	NA		2.93147	0.387959	0.124035
	f479c23321346918723839e33a3544f4	Firmicutes	UBA1819	uncultured_organism	2.53399	0.374461	0		2.35045	0.409816	0.0763982		-0.183535	0.940073	0
	59777186ad2e0947e97615b5d6225136	Firmicutes	Faecalibacterium	NA	-2.29529	0.357124	0		-3.17651	0.20251	0.10129		-0.881225	0.678375	0.00200633
	8e175abe6a746b8f33bae9cd7c8192bb	Firmicutes	Faecalibacterium	NA	-2.19549	0.410275	0		-3.89579	0.143914	0.12433		-1.7003	0.453909	0.0841245
	5edd946e0a26ae1c85ed8c498c328387	Firmicutes	Faecalibacterium	NA	-2.81303	0.464103	0		-2.97349	0.438998	0.0730923		-0.160463	0.960896	0
	f5f5e0da89730462abaf6301a9557193	Firmicutes	Faecalibacterium	NA	-0.838169	0.739949	0		-1.05056	0.677385	0.0113524		-0.212393	0.921431	0
	c48070f3061b086b60ff32f77e0002fa	Firmicutes	Subdoligranulum	NA	-1.3519	0.59534	0		-2.11149	0.406774	0.0763982		-0.75959	0.726297	0
	2c353937b82f39126e9aeead6f624ac9	Firmicutes	Subdoligranulum	NA	0	1	0		-6.52583	0.100401	0.168618		-6.41217	0.0566557	0.389424
	9639a3291729a3758207b47715d9205f	Firmicutes	Subdoligranulum	NA	4.07754	0.125313	0		0.165215	0.950437	0		-3.91233	0.0847012	0.329339
	9bcdff78f108f90ce33eea9907c345d2	Firmicutes	NA	NA	3.82453	0.331336	0		NA	NA	NA		0	1	0
	41d37de8c9428dfc20b3ce3c1af50d57	Firmicutes	uncultured	NA	2.49815	0.529473	0		NA	NA	NA		NA	NA	NA
	cfbe362c3a65e21086ab0dca16de815b	Firmicutes	uncultured	NA	-2.94978	0.460951	0		NA	NA	NA		NA	NA	NA
	18cda6ce7e2ea7ca0d8f1ad9924df7e9	Firmicutes	uncultured	NA	0	1	0		NA	NA	NA		NA	NA	NA
	6e7dcdec78c483cd8d6666e4eedccd4f	Firmicutes	NA	NA	-3.25369	0.415394	0		-2.83821	0.478121	0.0634516		0.415479	0.901015	0
	9caa17e57e109afb50d44bc2d1ddfe1a	Firmicutes	NA	NA	0	1	0		NA	NA	NA		NA	NA	NA
	de641e423b4a00fd0c6ae6fa5d27e866	Firmicutes	NA	NA	3.50185	0.374477	0		NA	NA	NA		NA	NA	NA
	a86f931477495d1c646eca41599dc17d	Firmicutes	uncultured	NA	-2.02084	0.615303	0		NA	NA	NA		NA	NA	NA
	d6aca1ce3a8896b5a4ac550a4108ddd9	Firmicutes	uncultured	human_gut	0	1	0		NA	NA	NA		NA	NA	NA
	f1b2f54e573dda962825c447a7eacc6e	Firmicutes	uncultured	human_gut	2.96859	0.453047	0		NA	NA	NA		NA	NA	NA
	d56fd4c21346f6d694c7e638f6bdcb70	Firmicutes	uncultured	human_gut	0	1	0		-5.17392	0.193153	0.108807		-5.06025	0.133073	0.21815
	8390c05beb7f50a7d1775ab67067e4ed	Firmicutes	NA	NA	0	1	0		NA	NA	NA		NA	NA	NA
	7833074066f573412e006089e2382255	Firmicutes	NA	NA	2.49815	0.529473	0		NA	NA	NA		NA	NA	NA
	b204a17b1a7f29074d81303d5ca68464	Firmicutes	Phocea	uncultured_bacterium	-4.79093	0.228505	0		0	1	0		4.66357	0.166626	0.172156
	e8edd2061e07869c7cac70f92f16b725	Firmicutes	NA	NA	0	1	0		NA	NA	NA		NA	NA	NA
	ef1243f7818d1e35c1e968e8539173cf	Firmicutes	Anaerotruncus	Anaerotruncus_sp.	0	1	0		-4.18629	0.293133	0.0920477		-4.07261	0.227698	0.131669
	7c3d7711fd15460714ece118b35c0576	Firmicutes	Anaerotruncus	uncultured_organism	3.97221	0.31272	0		0.313889	0.935447	0		-3.65832	0.279237	0.131669
	fe1d758f268d0c3fe3c677aed90ffd1e	Firmicutes	NA	NA	0	1	0		-4.45625	0.262857	0.0967748		-4.34256	0.198015	0.131669
	76ec16cef4c7230bd9bcad23c56fba9f	Firmicutes	NA	NA	-1.72878	0.667816	0		NA	NA	NA		NA	NA	NA
	ce165f53919ff20a670ca93682e98392	Firmicutes	uncultured	metagenome	2.82155	0.476249	0		NA	NA	NA		NA	NA	NA
	0c570ae08ebbe801fa6a3e8a24678138	Firmicutes	uncultured	uncultured_bacterium	0	1	0		NA	NA	NA		NA	NA	NA
	8d9bcd27a99a88d2d3fe0cffdbca2718	Firmicutes	uncultured	uncultured_organism	0	1	0		NA	NA	NA		NA	NA	NA
	d8ff4c5e15cb162f9a378b2ca1e7d1a2	Firmicutes	Harryflintia	NA	-0.113705	0.977568	0		NA	NA	NA		NA	NA	NA
	57a2b7f3845e9dc1a8bf96b2539bde57	Firmicutes	Paludicola	uncultured_bacterium	-3.2537	0.415393	0		-2.02551	0.614632	0.021359		1.22819	0.715241	0
	6fe15c78022c1b27688de5f58f793db8	Firmicutes	[Clostridium]_methylpentosum_group	NA	0	1	0		NA	NA	NA		NA	NA	NA
	54a2bfb0a96adc52c4ccca239ad01466	Firmicutes	[Eubacterium]_siraeum_group	uncultured_bacterium	-3.51655	0.378232	0		NA	NA	NA		3.38919	0.316907	0.131669
	d9eea834805833ac21a86fdabedd8556	Firmicutes	Ruminococcus	NA	1.19666	0.73587	0		0.430399	0.90341	0		-0.766261	0.800101	0
	0266b37dda69c8fd306c9e0ee679e583	Firmicutes	uncultured	uncultured_bacterium	3.67219	0.351283	0		NA	NA	NA		NA	NA	NA
	596db8ce20ae5cbfdc338a62f1bed1d9	Firmicutes	Incertae_Sedis	[Clostridium]_leptum	-1.01866	0.76787	0		-3.04444	0.377586	0.084215		-2.02578	0.490966	0.0715501
	c5ed5baac8c4ff452a1e65a58e880bfa	Firmicutes	Incertae_Sedis	uncultured_organism	0	1	0		NA	NA	NA		-3.25696	0.336278	0.131669
	149465e40c1bdbc6230588a58a4d6eb0	Firmicutes	Incertae_Sedis	uncultured_organism	-1.64565	0.563311	0		-2.99696	0.291882	0.0920477		-1.35131	0.574619	0.0348885
	6181124eb7d8f01051de7085d7e0b6ad	Firmicutes	Caproiciproducens	NA	0	1	0		NA	NA	NA		NA	NA	NA
	10e6c9f12f57fa3bdbbe79360f42660c	Firmicutes	Incertae_Sedis	uncultured_bacterium	3.67219	0.351283	0		NA	NA	NA		NA	NA	NA
	aff3962bbd7607a2971161d9840ca409	Firmicutes	Incertae_Sedis	NA	-5.17075	0.19348	0		-4.03208	0.311447	0.0920477		1.13867	0.729797	0
	ad139328ba8ac39c2e5ccef543df2deb	Firmicutes	Incertae_Sedis	NA	-0.148485	0.963574	0		-2.17872	0.50252	0.0501662		-2.03023	0.463693	0.0801985
	49a2ea7eebe52a4aed8f3126b7f72570	Firmicutes	uncultured	metagenome	-3.86528	0.332227	0		0	1	0		3.73792	0.26892	0.131669
	db74729dd7ab527fba7a5a66a59f207a	Firmicutes	uncultured	uncultured_Clostridium	0	1	0		NA	NA	NA		NA	NA	NA
	200aa5aedfdb6b38cd3eef0444727140	Firmicutes	uncultured	uncultured_Clostridium	0	1	0		NA	NA	NA		NA	NA	NA
	6acfe69f470ceebec0cce442b1190fa9	Firmicutes	CAG-352	uncultured_organism	0	1	0		NA	NA	NA		NA	NA	NA
	e367dacc4cf58de7164775e5899d4ab2	Firmicutes	DTU089	NA	-1.75625	0.60816	0		-2.25816	0.509082	0.0482191		-0.501902	0.861172	0
	7f9c14ef4eb251a43b71add4c10a821f	Firmicutes	DTU089	uncultured_organism	0	1	0		NA	NA	NA		NA	NA	NA
	8135beec331a8d558070c38b580e4b8e	Firmicutes	CAG-352	uncultured_bacterium	-0.961746	0.79202	0		-1.03045	0.77754	0.00576095		-0.0687068	0.982377	0
	d4454a4ebd63a8e375dadd2632588f59	Firmicutes	uncultured	NA	0	1	0		NA	NA	NA		-3.55226	0.293625	0.131669
	81d8bf5f800f7da13be5d9afa704b5f2	Firmicutes	uncultured	NA	3.08557	0.435054	0		NA	NA	NA		NA	NA	NA
	ef2a1531066bf60397c9df449d532d2f	Firmicutes	NA	NA	0	1	0		NA	NA	NA		NA	NA	NA
	a6d3beca765c1e2453b658614facf89f	Firmicutes	NA	NA	-5.26544	0.1854	0		-4.30578	0.279453	0.0920477		0.959663	0.770747	0
	a62fa6e25e8805dafe5b628529c90023	Firmicutes	NA	NA	0	1	0		-5.45277	0.170118	0.108807		-5.3391	0.112857	0.246487
	94a78de372f84ee85becee23876e82c9	Firmicutes	Lachnospiraceae_UCG-010	uncultured_bacterium	0	1	0		NA	NA	NA		-3.63954	0.281749	0.131669
	336cfe29afee6918ae3d241519b3f98d	Firmicutes	Lachnospiraceae_UCG-010	uncultured_organism	0	1	0		NA	NA	NA		NA	NA	NA
	cf315874f2a721ae340f6dbf4ec0c2d6	Firmicutes	NA	NA	-2.43971	0.543047	0		NA	NA	NA		NA	NA	NA
	4fe24c83710e67de05912a5ca0657fd2	Firmicutes	Tuzzerella	uncultured_bacterium	0	1	0		NA	NA	NA		NA	NA	NA
	f46deaf5851879b6a8d849043a70f8f5	Firmicutes	uncultured	bacterium_enrichment	3.23353	0.412898	0		NA	NA	NA		NA	NA	NA
	52573485a4521e007e4c5217fc5d7c68	Firmicutes	NA	NA	0	1	0		-4.4202	0.266769	0.0967748		-4.30651	0.201805	0.131669
	8fb773e61e6ee7f5e0fde91cb4d2df09	Firmicutes	NA	NA	0	1	0		NA	NA	NA		NA	NA	NA
	40c224bbde3afb84430a840676a0115a	Firmicutes	Defluviitaleaceae_UCG-011	uncultured_bacterium	0	1	0		NA	NA	NA		NA	NA	NA
	2fea67e2ef146b654e84d4ccd727bed7	Firmicutes	Defluviitaleaceae_UCG-011	uncultured_bacterium	-3.2438	0.416833	0		-3.75217	0.34659	0.0912884		-0.508371	0.878406	0
	b78ebf1bcece3137a70ebe7310d29bea	Firmicutes	Defluviitaleaceae_UCG-011	uncultured_bacterium	0	1	0		NA	NA	NA		NA	NA	NA
	41763795f87aaa0989e0f7327024a298	Firmicutes	Lachnospiraceae_NK4B4_group	uncultured_bacterium	4.0881	0.298607	0		0.164842	0.966033	0		-3.92326	0.245429	0.131669
	6851a4ee264b56be2fff4686ce269907	Firmicutes	[Eubacterium]_hallii_group	NA	-0.340028	0.884455	0		-0.516575	0.82526	0.00170827		-0.176547	0.929493	0
	dd80e0a50520c9481217ccdf670781a6	Firmicutes	[Eubacterium]_hallii_group	NA	0	1	0		-6.33544	0.110747	0.161687		-6.22178	0.0644375	0.369331
	aac0099991c8518a5268b1a19a84550b	Firmicutes	[Eubacterium]_hallii_group	NA	-0.471753	0.858802	0		-0.807714	0.760646	0.00576095		-0.33596	0.881863	0
	87c18e8ee3789954404f2c1a35079a09	Firmicutes	[Eubacterium]_hallii_group	uncultured_organism	0.940078	0.774504	0		-2.58243	0.429581	0.0730923		-3.5225	0.207592	0.131669
	ca9cf3f426056b8af4bc32a34838a7ec	Firmicutes	Lachnospiraceae_NK4B4_group	uncultured_bacterium	0	1	0		NA	NA	NA		-3.44194	0.309113	0.131669
	99372eb499f11523b865a7535e57cf0a	Firmicutes	NA	NA	0	1	0		NA	NA	NA		NA	NA	NA
	2e178003351a4261fe4242284dfcd719	Firmicutes	Lachnospiraceae_UCG-004	uncultured_bacterium	0	1	0		NA	NA	NA		NA	NA	NA
	b0e56c25ca193e27096e8fb4eb560eee	Firmicutes	Eisenbergiella	NA	4.17842	0.28791	0		NA	NA	NA		0	1	0
	07699fa14cb8970eee5e8dda19dd5dbe	Firmicutes	Eisenbergiella	uncultured_organism	-6.78045	0.0877993	0.010028		0	1	0		6.65312	0.0479571	0.424026
	afe1dc97376cf249b67fa422dfa32477	Firmicutes	[Eubacterium]_xylanophilum_group	uncultured_bacterium	3.82453	0.331336	0		NA	NA	NA		0	1	0
	cb89e1b7ff82a658c8def6e75f5c14bc	Firmicutes	Lachnospiraceae_UCG-008	metagenome	-3.38886	0.396021	0		NA	NA	NA		3.26149	0.335811	0.131669
	973ca62579b1246f54829278d51475ea	Firmicutes	[Eubacterium]_xylanophilum_group	uncultured_organism	-6.86622	0.0597425	0.152412		-7.69733	0.0347544	0.479312		-0.831114	0.78092	0
	bee040b0942c767b368519c4706f8cdb	Firmicutes	[Eubacterium]_xylanophilum_group	NA	4.90313	0.211525	0		4.88946	0.212801	0.10129		0	1	0
	c0044f57ec04cd70905d690c5b7bd147	Firmicutes	Coprococcus	Lachnospiraceae_bacterium	0	1	0		-5.27742	0.184348	0.108807		-5.16375	0.125263	0.220429
	6c324279c1fc2965e594486ac26b0548	Firmicutes	Coprococcus	unidentified	3.08557	0.435054	0		NA	NA	NA		NA	NA	NA
	05dbbf0301a9625e1f1a41470a92f7fe	Firmicutes	Anaerostipes	NA	-1.46848	0.704777	0		1.16811	0.765271	0.00576095		2.63659	0.428891	0.0959473
	33518e48b174ac428cb7be1a216c6c6e	Firmicutes	Anaerostipes	NA	-0.863439	0.637196	0		-1.1657	0.524288	0.0385439		-0.302259	0.846458	0
	0243b68c76049aa1b8c51a20333da950	Firmicutes	Lachnospiraceae_ND3007_group	metagenome	0.43406	0.835644	0		-2.57495	0.218071	0.0967748		-3.00901	0.0915538	0.316654
	79ba9fd704fc7264b695cc0504c337a9	Firmicutes	Lachnospiraceae_FCS020_group	metagenome	-2.41288	0.54755	0		NA	NA	NA		0.233444	0.944958	0
	d2095165eb4000070cc2649c6f4b6cb9	Firmicutes	NA	NA	-2.83346	0.479099	0		NA	NA	NA		NA	NA	NA
	efcfc19372879de4763f111fd3dd8487	Firmicutes	Howardella	Catonella_sp.	-0.00940054	0.99814	0		NA	NA	NA		NA	NA	NA
	36d9ad396b85196c9b4cf68b81789585	Firmicutes	Lachnospira	NA	-6.20597	0.0310448	0.362605		-5.7449	0.0459097	0.394133		0.461071	0.849304	0
	9e1f282914b07cd79711ce21e7cf4aff	Firmicutes	[Eubacterium]_eligens_group	NA	4.62344	0.174795	0		-0.47091	0.889603	0		-5.09435	0.0800337	0.347734
	208c0c43c7c5d4a6bb549e0c8365cd21	Firmicutes	[Eubacterium]_eligens_group	NA	1.08331	0.777824	0		-0.968946	0.800685	0.00576095		-2.05226	0.530807	0.0545533
	6ec1023583647a401269990c4e8ad716	Firmicutes	Lachnospira	NA	-1.0566	0.749266	0		-2.87114	0.385008	0.0818951		-1.81455	0.51949	0.0605586
	a55a010c9525ce2943a553dca1421b1c	Firmicutes	[Eubacterium]_ventriosum_group	uncultured_bacterium	0	1	0		-5.28916	0.183368	0.108807		-5.17549	0.124401	0.220429
	1a78539b37f0546f2a1643da51ce7636	Firmicutes	Lachnospiraceae	Cuneatibacter_caecimuris	-2.59086	0.518022	0		NA	NA	NA		NA	NA	NA
	70745fa69950bfb64db28e3afff2b1e5	Firmicutes	Frisingicoccus	NA	0.313651	0.935324	0		0.986263	0.798916	0.00576095		0.672613	0.838966	0
	987d91be27fb6ea759deb50423a524f8	Firmicutes	Frisingicoccus	uncultured_organism	0	1	0		NA	NA	NA		-3.32986	0.325393	0.131669
	57c86f7a9797d9d5a1944ea9967669ba	Firmicutes	Catenibacillus	NA	0	1	0		NA	NA	NA		-3.01309	0.374375	0.125663
	36c3c3e931ebb36c143c46739b848668	Firmicutes	GCA-900066575	uncultured_bacterium	0	1	0		NA	NA	NA		NA	NA	NA
	65990c74559e4adfaa672a884ad7d464	Firmicutes	Coprococcus	metagenome	0.458238	0.846762	0		-1.18957	0.61567	0.021359		-1.64781	0.415023	0.10247
	8d284209258fba29d50f9855d9cd5d93	Firmicutes	uncultured	butyrate-producing_bacterium	-3.5857	0.368809	0		NA	NA	NA		3.45834	0.306969	0.131669
	923fed1e3a5c67f886eb287b585a924a	Firmicutes	GCA-900066575	uncultured_bacterium	-2.41406	0.423367	0		-3.07856	0.306677	0.0920477		-0.664496	0.791977	0
	8c8a105de3169d2d55fcb9cfc2f52cf9	Firmicutes	GCA-900066575	NA	-3.57878	0.369745	0		NA	NA	NA		3.45142	0.307953	0.131669
	54886b8e1a829f2bf0f874ea7a002750	Firmicutes	NA	NA	-0.113701	0.977569	0		NA	NA	NA		NA	NA	NA
	939e90314e7b9c0d84df16a12d8ec059	Firmicutes	Dorea	uncultured_bacterium	-4.16793	0.295384	0		0	1	0		4.04057	0.23155	0.131669
	496d7f479392def9414da33c9137e40a	Firmicutes	NA	NA	-0.237693	0.950842	0		0.105729	0.97813	0		0.343421	0.916853	0
	2e4f2b53b856c4def6d021d01f5abb70	Firmicutes	Dorea	uncultured_bacterium	-1.07951	0.653205	0		-2.41475	0.314817	0.0920477		-1.33525	0.514469	0.0605586
	5149bdbf03de13bb38557d48d5141b87	Firmicutes	Lachnoclostridium	[Clostridium]_scindens	-0.498506	0.886277	0		1.84508	0.59794	0.0217556		2.34359	0.432669	0.0957164
	c24e0e391aa836b5eae25567c7eb89ee	Firmicutes	[Ruminococcus]_gnavus_group	NA	-2.06031	0.47371	0		0.379727	0.894999	0		2.44004	0.31983	0.131669
	9f1c7313b24bc98241173ae7db699bd0	Firmicutes	Moryella	human_gut	0	1	0		NA	NA	NA		-3.01309	0.374375	0.125663
	396ffa76286336a3eeb1ea420e60f86b	Firmicutes	Lachnospiraceae_UCG-001	NA	-0.111199	0.97691	0		-0.786939	0.837668	0.00124597		-0.67574	0.836565	0
	9484afed9f64641667938e294c07fe7c	Firmicutes	Roseburia	uncultured_Roseburia	-0.995659	0.796124	0		-1.76691	0.646422	0.0140422		-0.771252	0.814082	0
	ab9899b443255cd34e51705c7b8ea201	Firmicutes	Roseburia	gut_metagenome	-2.89926	0.365976	0		-4.04927	0.206578	0.10129		-1.15	0.672412	0.00200633
	fa2bd2f1500f2aadfa41c605e68f78c0	Firmicutes	Roseburia	NA	0	1	0		-6.20226	0.118474	0.161687		-6.0886	0.0703911	0.362097
	d668488fa839c37c80ae10d320cf3665	Firmicutes	NA	NA	0	1	0		-6.70102	0.0915767	0.179921		-6.58736	0.0502036	0.419656
	e519383a06425a8359d976fb81a08389	Firmicutes	NA	NA	0	1	0		NA	NA	NA		NA	NA	NA
	b1479e74e93e243fc221f7c8b415f507	Firmicutes	NA	NA	-4.98703	0.209892	0		0	1	0		4.85968	0.149345	0.188719
	c664f648f475bfd863f78a957eebe65a	Firmicutes	Lachnospiraceae_UCG-001	NA	-5.73011	0.149355	0		0	1	0		5.60277	0.0960878	0.300926
	fc00ed40b15cd5fa384b672502a3adc3	Firmicutes	Agathobacter	Eubacterium_ramulus	2.72342	0.435252	0		-1.82259	0.600719	0.0217556		-4.54601	0.126907	0.220429
	33ddca6781100b91d670de9a543e5aa7	Firmicutes	Shuttleworthia	uncultured_bacterium	-0.113699	0.977569	0		NA	NA	NA		NA	NA	NA
	96040114b5274bdb987f28c63b6b6b87	Firmicutes	Agathobacter	NA	0.143787	0.970159	0		0.824878	0.830143	0.00124597		0.681091	0.835547	0
	769723e5a9c6312f2ee3ab2781ac8ad6	Firmicutes	Shuttleworthia	uncultured_bacterium	-3.96015	0.320369	0		-4.12672	0.300119	0.0920477		-0.166572	0.95982	0
	e0cdaf99e96ca363991154bd1da46a59	Firmicutes	NA	NA	0	1	0		-6.87263	0.0835493	0.207523		-6.75897	0.0444932	0.440499
	545834b282c431706aeafbd5898d3507	Firmicutes	NA	NA	0	1	0		NA	NA	NA		-3.36006	0.320952	0.131669
	421cbd1d71d34704c6d53377261e213c	Firmicutes	[Eubacterium]_ventriosum_group	uncultured_Lachnospiraceae	3.47473	0.239965	0		-1.44865	0.619694	0.0205363		-4.92338	0.0517624	0.41393
	1b5d50e4ae6a2cb153f3b2ca04699419	Firmicutes	[Eubacterium]_ventriosum_group	NA	-4.11771	0.301299	0		0	1	0		3.99035	0.23748	0.131669
	5c4563e3dd7e12dcdf279783af929eaa	Firmicutes	NA	NA	-4.26678	0.189116	0		-4.51944	0.164233	0.108807		-0.252664	0.927261	0
	263e41ea2c25dc87bd2ff5910cf30d40	Firmicutes	Agathobacter	NA	-0.765613	0.73832	0		-1.65959	0.468952	0.0634516		-0.893974	0.647349	0.00822296
	ec6732c2e0d4cf64b3d0350e7fe3defb	Firmicutes	Roseburia	NA	0.386748	0.873901	0		0.187211	0.93876	0		-0.199537	0.923517	0
	69b90707f6f3da7941026fbe6a1597ce	Firmicutes	Lachnospiraceae_FCS020_group	uncultured_organism	-0.506575	0.870019	0		-1.46914	0.634812	0.0161747		-0.962568	0.714941	0
	d76d59ec71de0e3b22da0c9cd564d41a	Firmicutes	Fusicatenibacter	NA	-2.08013	0.203266	0		-1.12835	0.490128	0.0554571		0.951786	0.494728	0.0715501
	98143d3e3cd541c0028117de28d58c8c	Firmicutes	Sellimonas	uncultured_organism	4.27148	0.277166	0		1.39546	0.719357	0.00576095		-2.87602	0.396916	0.118
	4e2e6735331ad01a30c94d2f4c285dc2	Firmicutes	CAG-56	uncultured_bacterium	0.239936	0.94115	0		-1.53073	0.637487	0.0161747		-1.77067	0.522789	0.0594899
	9e3226efaf559eb14a478f880462cb8a	Firmicutes	[Ruminococcus]_torques_group	NA	-1.68186	0.59334	0		-1.42434	0.651103	0.0134016		0.257523	0.923587	0
	a85414d00d7f63d6e200967b1ba7d397	Firmicutes	[Ruminococcus]_torques_group	NA	3.45447	0.368782	0		2.74274	0.475167	0.0634516		-0.711728	0.828395	0
	08bd43071a06abf56df235fca6655bea	Firmicutes	[Ruminococcus]_torques_group	NA	-0.210549	0.933491	0		-0.690094	0.784425	0.00576095		-0.479545	0.823606	0
	fcffedae608fe4871be42936a1cb523a	Firmicutes	[Ruminococcus]_torques_group	Ruminococcus_lactaris	-5.13355	0.192427	0		-7.6935	0.0504232	0.364687		-2.55996	0.430583	0.0959473
	d515ae0a0b58aa13869a5966a80c98a9	Firmicutes	NA	NA	1.64694	0.672581	0		4.07442	0.300227	0.0920477		2.42748	0.476236	0.0723003
	61535a40adb8221483821e3984d0b1ac	Firmicutes	[Ruminococcus]_gauvreauii_group	NA	-0.668279	0.825185	0		-2.797	0.355015	0.0896435		-2.12872	0.408887	0.107022
	d8a42db5c61062f2a7b11fcdf03a65d5	Firmicutes	Marvinbryantia	NA	4.13217	0.251818	0		0.336589	0.924138	0		-3.79558	0.220961	0.131669
	0a68ec564e278b0246c920ad7de41880	Firmicutes	Blautia	NA	-1.35089	0.494839	0		-1.2041	0.542886	0.0348721		0.146786	0.930667	0
	12f9203b937a20a91b08aab804b28cd9	Firmicutes	Marvinbryantia	NA	0.512284	0.869207	0		-1.35255	0.663133	0.0125879		-1.86483	0.481777	0.0715501
	69310a7cff9f6b902cdfd08243784ace	Firmicutes	NA	NA	-3.74938	0.347096	0		-5.27775	0.18432	0.108807		-1.52837	0.64333	0.00822296
	15cfeb62055743aacb7f78e9aa86accd	Firmicutes	Marvinbryantia	uncultured_organism	-2.84108	0.477898	0		NA	NA	NA		NA	NA	NA
	3525e8f55cd3355cc02bb9df648623e2	Firmicutes	Blautia	NA	0	1	0		-7.21492	0.0692437	0.258717		-7.10127	0.0347309	0.513996
	8ca0b9917d926bb6241ce6e23673fce4	Firmicutes	Blautia	uncultured_Blautia	5.50458	0.160311	0		0.753682	0.844878	0.00124597		-4.75089	0.158681	0.176268
	518152583cf49fa56a2faead4d28e1e5	Firmicutes	Blautia	NA	-3.38881	0.396028	0		-5.34022	0.179153	0.108807		-1.95141	0.555073	0.0466776
	6afbda63b0750231cd586b402d745cd8	Firmicutes	Blautia	NA	-3.38886	0.396021	0		NA	NA	NA		3.26149	0.335811	0.131669
	bed671b4676144142cebd192b690f499	Firmicutes	Blautia	metagenome	-0.621001	0.746081	0		-1.72817	0.36741	0.0895859		-1.10716	0.498201	0.0702319
	2de0f958e30d26f04cba8d2a920bbe46	Firmicutes	Blautia	Ruminococcus_sp.	-4.87434	0.126428	0		-3.5041	0.272056	0.0967748		1.37024	0.611035	0.0162007
	a63f65ad0f7a1ffc9e5ea828e95cdd6b	Firmicutes	Blautia	NA	-0.213787	0.955624	0		2.92087	0.448811	0.0721632		3.13465	0.341222	0.131669
	3dd7acf39ab927348aafcd8acb08dd9a	Firmicutes	Blautia	NA	-0.177954	0.963193	0		4.78101	0.223227	0.0967748		4.95896	0.141137	0.200288
	00a96fbd0ac34bfd245f9c24f8737f7d	Firmicutes	Blautia	NA	-0.878102	0.686598	0		-0.91179	0.675243	0.0113524		-0.0336877	0.985515	0
	2561183f1e1ed26ec4289c703664fd27	Firmicutes	Blautia	NA	0	1	0		NA	NA	NA		-3.45834	0.306777	0.131669
	d71feb1923fa288790187009e8efa6d3	Firmicutes	Blautia	NA	0.546076	0.837077	0		0.544786	0.83745	0.00124597		-0.00129018	0.999546	0
	c6c3ab4e828fb40d6e05967b7aac9338	Firmicutes	Blautia	NA	-0.650731	0.703652	0		-0.983896	0.565182	0.031561		-0.333164	0.819347	0
	8aaed79d6563ff7925c774e39b662a14	Firmicutes	Marvinbryantia	NA	1.12893	0.731353	0		0.0963182	0.976598	0		-1.03261	0.712933	0
	5e7b0f820081e6961ee102598888cf0c	Firmicutes	Marvinbryantia	NA	0	1	0		-4.36228	0.273139	0.0967748		-4.2486	0.208006	0.131669
	d622c6bc1d5e3a4f0403d7d208981372	Firmicutes	Lachnospiraceae_NK4A136_group	uncultured_organism	1.80798	0.637942	0		0.248734	0.948344	0		-1.55925	0.634298	0.00822296
	e37cec4fe16ca6453b47464bcad1054d	Firmicutes	Lachnospiraceae_NK4A136_group	NA	0	1	0		-4.03696	0.310856	0.0920477		-3.92327	0.245428	0.131669
	6eebb297aa85ef6c9bf9f89f02fed0b2	Firmicutes	uncultured	metagenome	-4.65493	0.213252	0		-6.27037	0.0929888	0.179921		-1.61544	0.59943	0.0229404
	073a66448a29195cf9b5752fd9db4808	Firmicutes	NA	NA	0	1	0		NA	NA	NA		-3.47932	0.303805	0.131669
	fbb584c0e26a937725fe5264705736ca	Firmicutes	Syntrophococcus	NA	3.82453	0.331336	0		NA	NA	NA		0	1	0
	ac603e12c4b975609374395b148a0a79	Firmicutes	Lactonifactor	uncultured_bacterium	3.44231	0.382805	0		NA	NA	NA		NA	NA	NA
	4912cd4c1f9a773f88a73c258c25c825	Firmicutes	[Eubacterium]_fissicatena_group	NA	4.08806	0.298611	0		NA	NA	NA		-0.0136726	0.996837	0
	60614520ce7378162013d9e6054a37ef	Firmicutes	NA	NA	2.49815	0.529473	0		NA	NA	NA		NA	NA	NA
	bd5ef8f372e09bcf6ec35825be4f053c	Firmicutes	Coprococcus	NA	-1.46414	0.494621	0		-0.951514	0.657166	0.0126871		0.512627	0.779107	0
	82951a303da449dcef90cdd0400440f0	Firmicutes	Tyzzerella	NA	4.07898	0.299701	0		NA	NA	NA		0	1	0
	e220e84c750738e230e8ecfe97decc4c	Firmicutes	uncultured	uncultured_Eubacterium	-1.0336	0.712781	0		0.0626254	0.982232	0		1.09622	0.647122	0.00822296
	59fde92361d7af5a12b89009cc1665c3	Firmicutes	NA	NA	0	1	0		NA	NA	NA		NA	NA	NA
	664667183a91ac47de4771fa5456a698	Firmicutes	[Ruminococcus]_torques_group	NA	2.60477	0.499901	0		6.14479	0.116784	0.161687		3.54002	0.295498	0.131669
	ab67e55b934c5c29802d8a9e0a8f91cf	Firmicutes	NA	NA	-3.52185	0.377505	0		NA	NA	NA		3.39448	0.316138	0.131669
	452e8489334d0ba0cf7eeccea28f1364	Firmicutes	NA	NA	-4.4323	0.265543	0		-5.85354	0.140719	0.127241		-1.42124	0.665764	0.0020938
	f4cc6e4932f507b33d1335d801f54563	Firmicutes	Dorea	uncultured_Dorea	0.67756	0.74786	0		0.0285455	0.989192	0		-0.649015	0.718089	0
	c67445ed68d61f49e41b7bdd1de019fb	Firmicutes	Lachnoclostridium	NA	-0.769129	0.811275	0		0.752469	0.815388	0.00263977		1.5216	0.579824	0.032584
	6b5c5532185593c41966b2173ea9df1c	Firmicutes	NA	NA	-3.22443	0.419661	0		-3.57378	0.370264	0.0895859		-0.34935	0.916346	0
	4eec30260540cce6f062e08aaae58f7c	Firmicutes	NA	NA	-3.05884	0.444289	0		NA	NA	NA		2.93147	0.387959	0.124035
	47f770032218f91b352999ff1f663807	Firmicutes	Lachnoclostridium	NA	-4.44857	0.263778	0		0	1	0		4.32121	0.200357	0.131669
	360b8779251bfde96f1165e5202f83d6	Firmicutes	Lachnoclostridium	NA	-2.24432	0.576251	0		-3.57379	0.370262	0.0895859		-1.32946	0.691501	0
	db7f42d2a4ded289e177bb4c00edff61	Firmicutes	Lachnospiraceae_NK4A136_group	NA	1.34459	0.687432	0		1.09707	0.742676	0.00576095		-0.247517	0.930822	0
	18d1d3003cc423b568ba5b5ccb433023	Firmicutes	Lachnospiraceae_NK4A136_group	metagenome	3.4573	0.380699	0		NA	NA	NA		NA	NA	NA
	23d6e67ff377b63cc8506920f662b5a5	Firmicutes	Anaerosporobacter	uncultured_organism	0	1	0		-4.9484	0.213406	0.10129		-4.83472	0.151397	0.188719
	b1d8e09561b600103cc3d8b388c02478	Firmicutes	Lachnospiraceae_NK4A136_group	NA	4.99914	0.202633	0		-1.13043	0.769066	0.00576095		-6.12957	0.0685134	0.363727
	4f480409cf34da6fb985eaa1cf33a65b	Firmicutes	Lachnospiraceae_NK4A136_group	uncultured_Clostridium	5.61063	0.152352	0		0.879841	0.819309	0.00213874		-4.73079	0.160466	0.176268
	9b6b08a24a54e5b482f5a45e03dcb30e	Firmicutes	[Ruminococcus]_torques_group	uncultured_Clostridiales	-3.10138	0.437884	0		NA	NA	NA		2.97401	0.380973	0.125555
	ab2bf06813483fc14a49518863849a59	Firmicutes	[Ruminococcus]_torques_group	NA	-3.36378	0.399573	0		NA	NA	NA		3.23642	0.339607	0.131669
	2c0c62ea09b2efe01bacdcbcf558d2b8	Firmicutes	Lachnoclostridium	NA	-0.112245	0.971128	0		-2.90873	0.348029	0.0912884		-2.79648	0.29004	0.131669
	0a035a7ec1f4a194dd7fbda3c5660db0	Firmicutes	Lachnoclostridium	human_gut	-1.08603	0.746337	0		-0.671004	0.841628	0.00124597		0.415027	0.884633	0
	119eea33cb9f505d6a20297d132e792a	Firmicutes	NA	NA	1.08111	0.696809	0		-2.96979	0.283542	0.0920477		-4.05089	0.0867495	0.329339
	7d2402f1612fe6c2f5c20bfda4a90aa0	Firmicutes	Lachnospiraceae_UCG-008	uncultured_organism	-0.494187	0.859847	0		-1.05836	0.705068	0.00823385		-0.564172	0.812764	0
	a5a4b4d58bdd795871acf39629c9e584	Firmicutes	NA	NA	1.5755	0.683024	0		-0.686492	0.858354	0		-2.26199	0.492038	0.0715501
	6e57b32b545e72b802822e1554c70868	Firmicutes	NA	NA	4.56132	0.245484	0		-0.39144	0.919184	0		-4.95276	0.141579	0.200288
	19715b1593c19aa6d35a4d1e3cd09374	Firmicutes	Lachnospiraceae_UCG-004	NA	0.325922	0.885941	0		-2.08122	0.358348	0.0895859		-2.40714	0.21326	0.131669
	a891fb44241e433fa8acf251ef4d328f	Firmicutes	NA	NA	0.209929	0.94925	0		-1.81136	0.582075	0.0251416		-2.02128	0.471658	0.0747047
	56be4da3a014f35ce47922774c9156c9	Firmicutes	NA	NA	-2.65528	0.507539	0		NA	NA	NA		NA	NA	NA
	708b000c48dbefb1454b79108d2a1f70	Firmicutes	NA	NA	-4.69642	0.22409	0		-4.35587	0.259516	0.0967748		0.340544	0.917144	0
	6eaef2dd2e8097421a196c104a2b76c8	Firmicutes	Lachnoclostridium	NA	0	1	0		-6.40256	0.107007	0.161687		-6.2889	0.0615987	0.369331
